# Supplementary material
Source: PubMed Central journal article supplement (PMC2043039)
Supplement: pbio.0050275.sd001.pdf [file pbio.0050275.sd001.pdf]

>Rmr1-Progenitor allele | genomic | 6610 bp

ATGGATCGCGCCACGCCGCGGTTTGGCGCCGCCGCGGCGTATCCCAAGCGGCGGTGGAAGCTG  
CGCCGTCTCCTCCC GCGCGCGCCGCCGCGATAAGGCGCCGGCCGTTGTCATGGACCTTGGCGA  
CGACGACTGCGGGCGGTGGCGGGGCCAGGAAGACGGTTGGTGGCGCTGCAGGTAGGTGCGAGGGA  
TCCACGAAGGCTCCTTCGCTATGCTGCCGCCGATGATGGTGCCGGCGGGAGCGGTGGCGCTGC  
GGACACGATCGAGGAGGCGGGCGATGCTGGCGGCGGCAGTGGTGGAAAGAGGCGCCAACGAAGAA  
GAAGAAGAAGGAAGGAGCGATCCCAGATGCCGCGGAGGCAACCCGTGGCCACGGGAGCAAGGCC  
GCTGCGACCTCGATGGCGACGTCGAGCCATAAGCGGCGCGCTGGGACCTCGAGGTCGACGTCGA  
GAGATAAGCGGCGCGCGCTCGGGACGTGCCTCGGAGCCAGCTCGCGTGGGCCGCGCGCGCAA  
GCGCAAAGGAACGAGTTGGAGGCCCGCTCGGAGAGAACGTGTGAAGGCGCCATGTGTCACT  
GAAAGTGATGACAACAGCGGGCGAGGCGATGACGCTTCTCATGACGGGGATGCGGAGCCTCGCG  
GTGGGGTCGCCATTGGCACTGATCTGGTTAACGGGGACCATCCGGCAGCTAAAGGTGAGGATCA  
TATTAAGAGAAGAGTGTGTGAATTTGAATGATGACTTGGTCTCATGTAATGCAGAGGTAGTGG  
AAGGTGCTGGTGACGAGGACACAGGGGACGGAGGGAACAGTGGCCTGGCATCGACTGCTGATGT  
GGTTGCTGAGGAGATGGCACCCCTTGAAGATGACTACGATGATGAGATGTTGGAGGAGCAGCTT  
GTTGGAGATGTGATTCGTGCTTACAGTAATGGCAGAACTTAGATTCAGATGGAGTGGATTGGG  
AGGCAGAGGATGAGATGGAGTTCATGACGATGCTGACAATAGTGATTTTATGGATGATGCTGA  
CGATAGTGATTTTATGGATGATGCTTATGAAGGTGGCAATTCCAACCAATTCAAATCATGCT  
AAGTTGGAAATACAAGACTGGGTGAACCAGAAAGTTGTTTTGAGTGGAGGGAGGTGTGAGGTGA  
GGGGCGAGGGGGATCTGGAGGAAGAATTGGGTGTGGGAAAGGAAGCAGATGAGGAGGACGTGGA  
ACCAAAGAGTGAAGCAGCTCCAGGTTCTGATAAAAGGGTCTTGCAGTTAGAAATCCTAGGTTCC  
GATGAGGAAATCAAGGTGCTTGAAAATATGAGTAGTGCCCATCCAGGAAGGCGTCAGTTCAAT  
CGAAGTTACCAACTATTCCATCTTGTGTTGCATGGAGAACCCGATCATCATGGGGGGTAAATCA  
AGATAGACTATCGTACGATACATATTTTGAAGGAATTATCTGATGAGCCAAAAGAGGATGATGAT  
GATACAGAGGTGGAACCTTGATGAAGTTGAGGATGACAACAATGACGATGACAGTAGTGATGCTT  
ATGATAAAGATGACGAAGAGAAGGAGGAAGAGGAAGAAGAGGCTGAAAGAAGAAAACCTAATAA  
CAGGATTTGCACATCCGATGAAGACATGATCAATATTACTGTTCCCTACATCAAGATATGATATG  
TTTAAGAAAAAAATTCCTCAAGATATGATATTGAGTGGGTGGAGGATGAAGATGCAAGTGTG  
ATATGTTACAGCCAGTTTCTTTAAGAAAGATAGCAGCTGGAAGCCTGTGGCTGTTGGCAACGA  
CACATTTACTGAGCAACAAAAGCGATCACGATTTACTTGGGAGCTTGAGAGGAGGAAAAAGCTT  
AAGCTTGAGATGAAGACAAATCCTTTGCATGAGCGGGATTTGGACTCAGATCCGAACTCATCAG  
GTTCTGACCAGATCAGAAAGTATGGTTTCAAAGTGTGAGGAGTCATAAAGTTGATAGGAAAAA  
GAAGCATAACATCGCCAAATCGGGCAAGAAACCCAGCAGCGCAATCATACTAAAGCGGCAGTCT  
CTTTTGAAGCTTTTGGTAGATAAAAATGAGTGGTGATAAAAAGTTTAGCATCTTTTCCATTTGATC  
AGAATCCTCAGCTTCAGTTTATTTTCAAAGAAATGCATCCATTGGTATTTTTCATTTGGAGATGA  
AGATCTAGTAGCAGCTGACAGGCCAGAGCAAGATGTTGGATTGGATATGTTATGGGCTGACTTT  
GACTTTGCTTTAGAGTCTGAGAATATCGGTACTTATTATGATGATGAGGTACATTCAGTACTGG  
TTTTCATTTTATTTTATCTATCAAACACATGCAGGTATAAATATGTGTGGTTTATTTATTTG  
AACACTGACTCTACAAC TAGAACTATGGTAAAATTAACAATGTCCAACCTGGAGATGCACTACCA  
TGTTATTCTCAGCAAAAAGTTTGTCAATGGCGACAAACGCAAAAAGTTTGATGAAACAATCTCG  
ATCAAACCAAAAAA ACTCTCATTATTCACCATCTGGCACAAGGGCAAAGATGCAGGAGATGCC  
CTCTAGGGAGCAGAACTCCAGCTATTTTTGGAGATGCACCATCAAACACATATCAGCTTTGTCA  
TTTCCAAATTGCCCATGCTCCAAGGGTGATGATCGAATTAAGCCATTTTGTTCCTCACCATTT  
TTTTCAACGGACCTTGTGAAACCTAACCATCAACCCTTGCTTCTCCCCTTGCCGATCATTCATC  
AAAGGAAACATCATCTATCTGTGGAGGACCTGCAGGCTGCAGCAGTCTAAACCAGAATTCTCAT  
GCAAAAACACACAATGTGAGCAGGTGATGATCATCTCAGCTTGATCACAAAGAGCACAGCAGG

TAGGGTGCAGAAGACTCATCATGCATGCTGATCGGCAGTCCATTACCTATTTTGAGTAAGTAAC  
CACAAAAGAACCAACACTTCCTGGGCCCAAGATTTTCAAATTCCTTTCCCAAGACCCAAGAGGA  
CAGAACCATGAAATAAACCTTATCAACAGACTTGCCTCAATCATCTACATCTATCGTTAACAT  
AACTAACAGAGAAGAAATAAACCATTTGAGCTCACTTTGATAGTGCAACACTTCTGTGAACAA  
TATGTGCATGTGAAATGTAGCCTCCTTTTCTCAGAATGCATATATCTGTGGTGTGTTGTCAAGGG  
CCTCACACTGCTGTCGTGTCCATAAAGAAAGCACAGGAATCAACAATCCTTCTTCGGGAACACT  
ATTGAAGCTAGAACCCAGAAATGTACAGAAAAAACTATTTAGGGCGTGGAATTCCTTCTGCATT  
TTCTTCAGTTTGATCTGGCTCTATTGTTTCTCAGATCATGTCTACGTCATGGTAGTTTTTTTTT  
ATCGAATGCGCAGGAGAGATGCGCATCATTATATTAAGAGATGAAAAGGTCCAAAATAGACCAG  
ACAAGATAGTAGAAAAGGCCCTTATGGTGGCCAAAAAGTAAGATACAGAAAATGATCCATTA  
AATCAATCATACTATAAATCCGACCGAAGAGGGTTCGGCAAGGTAGTTTGCAGCTAATGTGCAGG  
AAACGTCGTTTCCCAGAATAGAGTAACTTTGTAAACATTAGAAATGTTTTTTTTTTCAGGTCAAGA  
AATCTAGTTCACTTAAAGGAGTTACTATAGAATAGTTTATAACCATTATATTAAGAAGAGATGA  
AAAGGTCCAAAATAGACCAGCACAGATAGTACAAAAGGCCCTTATGGCGGAGTAAGATACAG  
AAAATGATCCATTAATCAATCCTACTATAAATCCGACCGAAGAGGGGCAGCAAGGTAGTTTGC  
AGCTAATGTGCAGGAAACGTCGTTTCCCAGAATAGAGTAACTTTGTAAACATTAGAAATGTTTT  
TTTAGGTCAAGAACTCTAGTTCACTTAAAGGAGTTACTATAGAATAGTTTATAACCATTAAAGG  
GCAATTCAGATAGCCTCAGAAGGTCAAGAAAACTTTATCATAGCCTGTGTGAATGTTTAGACAA  
AAAGGAAGCAGAAATGTTTGTCTTTGTCAAAGTTTCATCATCAGTGTGTTTCATTTAATGAT  
TTCCTTTTGTCCCAACATTAATGACTCAGTTACATGTTGTTTTTGCGAATGGAATTTTCTAACT  
TGGCAATGTTACTCAAACATATGTAGTATTCTGCATATCTGATACCACAGGTTGATTCTACTC  
TTAATTCGGCAATCAACATAAATAGTTTCATCTTTTAGAACTAGACACCCCTACTGCTTTCA  
TGTAAGTTATATAGCATTTCAAGGTCGTGCGTCCATGATATACTACTCGATTTTTAATGTTT  
ATTTTCTTGAATGCAAGAGTTTGTACCATTGCAGATACTTTGATTTGCCACTGTGAGAATGACT  
AAATGAACTTATTAGCTTATGTTGTATTGTAGTGTCAAGAAGGCAATCAACTAGATTTTTCTCT  
TGCCTCAGTAACACCCTGTTCTCGTGGGAAGCATGAATTTGTTATTGATGATCAAATAGGGATC  
AGATGCAAATACTGTTTCGTTGGTAAACCTGGAGATCAAATTCATGTTTCCATCACTGGTAAGCT  
TTATTATGGTCATAAATCATGACATCTATTCTACATAAATTTGGTCATTTAAGTCATCATTTTC  
TTTTAGGTGTCAGTGTGTTGGCGAGAAATCAGCATGGCCAAATGACAAAGGCGTGAAGAATACAC  
TGATGTTTCATGATCTTTATGAACAAGGAGTCAATGACACTGAACAATCTCAAGATATTCATCA  
ATATGGAACGGTGTGGAATCTTATTCAGGGGTCATCAGTACTATGTATGAGCATCAGCGTGAA  
GCATTTGAATTTATGTGGACAAATTTAGTTGGTGTATATTAGACTTGATGAGATAAAGCATGGAG  
CAAAACCTGATGTTGTTGGTGGATGTGTTATCTGTCATGCTCCTGGAACAGGAAAGACACGATT  
AGCTATTGTATTTATCCAGACATACATGAAAGTGTTCAGACTGTTCGGCCAGTGATTATTGCA  
CCACGTGGTATGCTCTTTGCTTGGGATGAGGAATTTAAGAAATGGAATGTTGATGTTCTTTTC  
ATATACTAAACACAACCTGATTACACTGGAAAAGAGGACCGGGACATATGCAAGTTAATAAAGAA  
AGAACATAGGACAGAAAAGTTGACAAGACTAGTCAAACCTGCTTTCATGGAACAAAGGCCATGGT  
ATTCCTTGAATAAGTTATGGTCTGTACACAAAACCTGACCTCTGAAAACCTGGCTGCACAGAAG  
AAAACAAAGTAAGAAGCATTCTTCTTGATAACCCTGGCTTACTTGTTCTTGATGAAGGACATAC  
ACCTAGGAATGAGCGCAGTGTATGTGGAAAACCTTAGGAAATGTGAAAACCTGAGAAGCGTATA  
ATTTTATCTGGAACCTCTTTTTCAGAACAAATTTTCTTGAGCTTTACAACATTCCTTTGTCTGGTAA  
GGCCTAGATTTGGTGAATGTTTTTTCAGCAAGTCAAGAGTAGGTCGAAGACATTATGTCTCAA  
AAAGCAAAAGGATAAGTTTTCTGATAAATATGAAAAGGGTGTGTTGGGCATCACTGACTAGCAAT  
GTAACCTGATGATAATGCGGAGAAAGTAAGATCAATATTGAAACCATTTGTTTCATATACATAATG  
GCAATATTCTTCGAACTCTTCCAGGACTCAGGGAGAGTGTAAATATTTTGAAGCCTCTTCCCT  
TCAAAGAGTATCATTAAGGTTGAAAACATTTGGTCTGGTAAACAACTTCGAACATGAATAT

GTCATTTCTTTAGCTTCTACACACCCTTCCCTTGTAACCGCCATTAACATGTCTGAGGAGGAAG  
CTTCACTTATTGATAAACCTATGCTTGCTAAAGTGAGATCAAATCCATATGAAGGGGTAAAAAC  
AAGATTTGTGATCGAAGTTGTTGTTTTGTCTGAAGCATTAAGAGAGAAGGTTTTGATTTTTAGC  
CAATTTATTCAGCCTCTAGAGTTGATTAAAGAGCATCTTCGCAAGTTCTTCAAATGGAGAGAAG  
GGAAAGAAATTCTTCAAATGGATGGAAAGATCCTTCCAAGATATCGCCAGGCTTCCATTGAAGC  
CTTCAATAATCCAAATAATGATTCAGGGTGTACTTGCATCTACAAGAGCATGCTGTGAAGGG  
ATTAGCTTGACAGGTGCTTCAAGAATTGTGCTTCTAGATGTTGTTTGGAAACCAGCTGTTGGAA  
GGCAAGCCATCAGCAGAGCATTTAGGATAGGTCAGAAGAAATTTGTATATACATATAATTTGAT  
AACTTATGGAACAGGTGAAGGTGACAAATATGATAGGCAAGCAGAAAAGGATCACTTATCCAAG  
TTGGTCTTCTCTACAGAAGACGAGTTCAATAATGTTAGGAACATGTTATCTAAAGCTGAAATGG  
AGCACTGTTCTAAGTTTATCTCAGAAGATAAAGTTTTTGGAGGAGATGACTTCCCACGATCAACT  
TAAAGGAATGTTTTTGAAGATCCATTATCCACCAACTGAGTCAAACATTTGTCTATAGTTACAAT  
CAAATTGCTACTGAGTGA

>Rmr1-Progenitor allele | coding sequence | 4308 bp

ATGGATCGCGCCACGCCGCGGTTTGCGGCCGCCGCGGCGTATCCCAAGCGGCGGTGGAAGCTG  
CGCCGTCTCCTCCC GCGCGCGCCGCCGCGATAAGGCGCCGGCCGTTGT CATGGACCTTGGCGA  
CGACGACTGCGGCGGTGGCGGGCCAGGAAGACGGTTGGTGGCGCTGCAGGTAGGTGCGAGGGA  
TCCACGAAGGCTCCTTCGCCTATGCTGCCGCCGATGATGGTGCCGGCGGGAGCGGTGGCGCTGC  
GGACACGATCGAGGAGGCGGGCGATGCTGGCGGCGGCAGTGGTGGAAAGAGGCGCCAACGAAGAA  
GAAGAAGAAGGAAGGAGCGATCCCAGATGCCGCGGAGGCAACCCGTGGCCACGGGAGCAAGGCC  
GCTGCGACCTCGATGGCGACGTCGAGCCATAAGCGGCGCGCTGGGACCTCGAGGTGCGACGTCGA  
GAGATAAGCGGCGCGCGCTCGGGACGTGCCTCGGAGCCAGCTCGCGTGGGCCGCGCGCGCAA  
GCGCAAAGGAACGAGTTGGAGGCCCCCGCTCGGAGAGAACGTGTGAAGGCGCCATGTGTCACT  
GAAAGTGATGACAACAGCGGGCGAGGCGATGACGCTTCTCATGACGGGGATGCGGAGCCTCGCG  
GTGGGGTCCCATTTGGCACTGATCTGGTTAACGGGGACCATCCGGCAGCTAAAGGGGTAGTGA  
AGGTGCTGGTGACGAGGACACAGGGGACGGAGGGAACAGTGGCCTGGCATCGACTGCTGATGTG  
GTTGCTGAGGAGATGGCACCCCTTTGAAGATGACTACGATGATGAGATGTTGGAGGAGCAGCTTG  
TTGGAGATGTGATTCGTGCTTACAGTAATGGCAGAACTTAGATTCAGATGGAGTGGATTGGGA  
GGCAGAGGATGAGATGGAGTTCAATGACGATGCTGACAATAGTGATTTTATGGATGATGCTGAC  
GATAGTGATTTTATGGATGATGCTTATGAAGGTGGCAATTCCAAACCAATTCAAAATCATGCTA  
AGTTGGAATAACAAGACTGGGTGAACCAGAAAGTTGTTTTGAGTGGAGGGAGGTGTGAGGTGAG  
GGCGAGGGGGATCTGGAGGAAGAATTGGGTGTGGGAAAGGAAGCAGATGAGGAGGACGTGGAA  
CCAAAGAGTGAAGCAGCTCCAGGTTCTGATAAAAGGGTCTTGCAAGTTAGAAATCCTAGGTTCCG  
ATGAGGAAATCAAGGTGCTTGAATAATAGAGTAGTGCCTCATCCAGGAAGGCGTCAGTTCAATC  
GAAGTTACCAACTATTCCATCTTGTGTTGCATGGAGAACCCGATCATCATGGGGGGTAAATCAA  
GATAGACTATCGTACGATACATATTTTGGAGGAATTATCTGATGAGCCAAAAGAGGATGATGATG  
ATACAGAGGTGGAACCTTGATGAAGTTGAGGATGACAACAATGACGATGACAGTAGTGATGCTTA  
TGATAAAGATGACGAAGAGAAGGAGGAAGAGGAAGAAGAGGCTGAAAGAAGAAAACCTAATAAC  
AGGATTTGCACATCCGATGAAGACATGATCAATATTAAGTTTCTTACATCAAGATATGATATGT  
TTAAGAAAAAAATTCCTCAAGATATGATATTGAGTGGGTGGAGGATGAAGATGCAAGTGTGTA  
TATGTTACAGCCAGTTTCTTTAAGAAAGATAGCAGCTGGAAGCCTGTGGCTGTTGGCAACGAC  
ACATTTACTGAGCAACAAAAGCGATCACGATTTACTTGGGAGCTTGAGAGGAGGAAAAAGCTTA  
AGCTTGAGATGAAGACAAATCCTTTGCATGAGCGGGATTTGGACTCAGATCCGAACTCATCAGG  
TTCTGACCAGATCAGAAAGTATGGTTTTCAAAGTGATGGGAGTCATAAAGTTGATAGGAAAAAG  
AAGCATACATCGCCCAAATCGGGCAAGAAACCCAGCAGCGCAATCATACTAAAGCGGCAGTCTC

TTTTGAAGCTTTTGGTAGATAAAAATGAGTGGTGATAAAAAGTTTAGCATCTTTTCCATTTGATCA  
GAATCCTCAGCTTCAGTTTATTTTCAAAGAAATGCATCCATTGGTATTTTCATTTGGAGATGAA  
GATCTAGTAGCAGCTGACAGGCCAGAGCAAGATGTTGGATTGGATATGTTATGGGCTGACTTTG  
ACTTTGCTTTAGAGTCTGAGAATATCGGTACTTATTATGATGATGAGTGTCAAGAAGGCAATCA  
ACTAGATTTTTCTCTTGCCTCAGTAACACCCTGTTCTCGTGGGAAGCATGAATTTGTTATTGAT  
GATCAAAATAGGGATCAGATGCAAATACTGTTTCGTTGGTAAACCTGGAGATCAAATTCATGTTTC  
CATCACTGGTGTGAGTGTGGCGAGAAATCAGCATGGCCAAATGACAAAGGCGTGAAGAATAC  
ACTGATGTTTCATGATCTTTATGAACAAGGAGTCAATGACACTGAACAATCTCAAGATATTCAT  
CAATATGGAACGGTGTGGAATCTTATTCCAGGGTTCATCAGTACTATGTATGAGCATCAGCGTG  
AAGCATTGAATTTATGTGGACAAATTTAGTTGGTGATATTAGACTTGATGAGATAAAGCATGG  
AGCAAAACCTGATGTTGTTGGTGGATGTGTTATCTGTCATGCTCCTGGAACAGGAAAGACACGA  
TTAGCTATTGTATTTATCCAGACATACATGAAAGTGTTCAGACTGTCGGCCAGTGATTATTG  
CACCACGTGGTATGCTCTTTGCTTGGGATGAGGAATTTAAGAAATGGAATGTTGATGTTCCCTT  
TCATATACTAAACACAACCTGATTACACTGGAAAAGAGGACCGGGACATATGCAAGTTAATAAAG  
AAAGAACATAGGACAGAAAAGTTGACAAGACTAGTCAAACCTGCTTTCATGGAACAAAGGCCATG  
GTATTCTTGGAAATAAGTTATGGTCTGTACACAAAACCTGACCTCTGAAAAACCTGGCTGCACAGA  
AGAAAACAAAGTAAGAAGCATTCCTTCTTGATAACCCTGGCTTACTTGTCTTGTGATGAAGGACAT  
ACACCTAGGAATGAGCGCAGTGTATGTGGAACCTCTAGGAAATGTGAAAACCTGAGAAGCGTA  
TAATTTTATCTGGAACCTCTTTTCAGAACAATTTTCTTGAGCTTTACAACATTCCTTGTCTGGT  
AAGGCCTAGATTTGGTGAAATGTTTTTGACGAAGTCAAGAGTAGGTGCAAGACATTATGTCTCA  
AAAAAGCAAAGGATAAGTTTTCTGATAAATATGAAAAGGGTGTGGGCATCACTGACTAGCA  
ATGTAACCTGATGATAATGCGGAGAAAAGTAAGATCAATATTGAAACCATTTGTTTCATATACATAA  
TGGCAATATTCCTCGAACTCTTCCAGGACTCAGGGAGAGTGTAAATTTATTTTGAAGCCTCTTCCC  
CTTCAAAGAGTATCATTAATAAAGGTGGAACCAATTGGTCTGTTAACAACCTTCGAACATGAAT  
ATGTCATTTCTTTAGCTTCTACACACCCTTCCCTTGTAAACCGCCATTAACATGTCTGAGGAGGA  
AGCTTCACTTATTGATAAACCTATGCTTGTAAAGTGAGATCAAATCCATATGAAGGGGTAAAA  
ACAAGATTTGTGATCGAAGTTGTTTCGTTTGTCTGAAGCATTAAAGAGAGAAGGTTTTGATTTTTA  
GCCAATTTATTCAGCCTCTAGAGTTGATTAAGAGCATCTTCGCAAGTTCTTCAAATGGAGAGA  
AGGAAAGAAATTCCTCAAATGGATGGAAAGATCCTTCCAAGATATCGCCAGGCTTCCATTGAA  
GCCTTCAATAATCCAAATAATGATTCCAGGGTGTACTTGCATCTACAAGAGCATGCTGTGAAG  
GGATTAGCTTGACAGGTGCTTCAAGAATTGTGCTTCTAGATGTTGTTTGGAAACCAGCTGTTGG  
AAGGCAAGCCATCAGCAGAGCATTTAGGATAGGTGAGAAGAAATTTGTATATACATATAAATTTG  
ATACTTATGGAACAGGTGAAGGTGACAAATATGATAGGCAAGCAGAAAAGGATCACTTATCCA  
AGTTGGTCTTCTCTACAGAAGACGAGTTCATAAATGTTAGGAACATGTTATCTAAAGCTGAAAT  
GGAGCACTGTTCTAAGTTTATCTCAGAAGATAAAGTTTTGGAGGAGATGACTTCCACGATCAA  
CTTAAAGGAATGTTTTTGAAGATCCATTATCCACCAACTGAGTCAAACATTGTCTATAGTTACA  
ATCAAATTGCTACTGAGTGA

>Rmr1-A619 | genomic | 6610 bp

ATGGATCGCGCCACGCCGCGCGTTCGCGGCCGCCGCGCGTATCCCAAGCGGCGGTGGAAGCTG  
CGCCGTCTCCTCCC GCGCGCGCCGCCGCGGATAAGGCGCGGCCGTTGTTCATGGACCTTGGCGA  
CGACGACTGCGGCGGTGGCGGGCCAGGAAGACGGTTGGTGGCGCTGCAGGTAGGTGCGAGGGA  
TCCACGAAGGCTCCTTCGCCTATGCTGCCGCCGATGATGGTGCCGCGGGAGCGGTGGCGCTGC  
GGACACGATCGAGGAGGCGGGCGATGCTGGCGGCGGCAGTGGTGGAAAGAGGCGCCAACGAAGAA  
GAAGAAGAAGGAAGGAGCGATCCCAGATGCCGCGGAGGCAACCCGTGGCCACGGGAGCAAGGCC  
GCTGCGACCTCGATGGCGACGTCGAGCCATAAGCGGCGCGCTGGGACCTCGAGGTGCGACGTCGA

GAGATAAGCGGCGCGCGCTCGGGACGTGCCTCGGAGCCAGCTCGCGTGGGCCGCGCGCGCAA  
GCGCAAAGGAACGAGTTGGAGGCCCGCTCGGAGAGAACGTGTGAAGGCCCATGTGTCAGT  
GAAAGTGATGACAACAGCGGGCGAGGCGATGACGCTTCTCATGACGGGGATGCGGAGCCTCGCG  
GCGGGGTCGCCATTGGCACTGATCTGGTTAACGGGGACCATCCGGCAGCTAAAGGTGAGGATCA  
TATTAAGAGAAGAGTGCTGTGAATTTGAATGATGACTTGGTCTCATGTAATGCAGAGGTAGTGG  
AAGGTGCTGGTGACGAGGACACAGGGGACGGAGGGAACAGTGGCCTGGCATCGACTGCTGATGT  
GGTTGCTGAGGAGATGGCACCCTTTGAAGATGACTACGATGATGAGATGTTGGAGGAGCAGCTT  
GTTGGAGATGTGATTTCGTGCTTACAGTAATGGCAGAACTTAGATTCAGATGGAGTGGATTGGG  
AGGCAGAGGATGAGATGGAGTTCAATGACGATGCTGACAATAGTGATTTTATGGATGATGCTGA  
CGATAGTGATTTTATGGATGATGCTTATGAAGGTGGCAATTCCAACCAATTCAAAATCATGCT  
AAGTTGGAAATACAAGACTGGGTGAACCAGAAAGTTGTTTTGAGTGGAGGGAGGTGTGAGGTGA  
GGGGCGAGGGGGATCTGGAGGAAGAATTGGGTGTGGGAAAGGAAGCAGATGAGGAGGACGTGGA  
ACCAAAGAGTGAAGCAGCTCCAGGTTCTGATAAAAGGGTCTTGCAGTTAGAAATCCTAGGTTCC  
GATGAGGAAATCAAGGTGCTTGAAAATATGAGTAGTGCCCATCCAGGAAGGCGTCAGTTCAAT  
CGAAGTTACCAACTATTCCATCTTGTGTTGCATGGAGAACCCGATCATCATGGGGGGTAAATCA  
AGATAGACTATCGTACGATACATATTTGAGGAATTATCTGATGAGCCAAAAGAGGATGATGAT  
GATACAGAGGTGGAACCTTGATGAAGTTGAGGATGACAACAATGACGATGACAGTAGTGATGCTT  
ATGATAAAGATGACGAAGAGAAGGAGGAAGAGGAAGAAGAGGCTGAAAGAAGAAAACCTAATAA  
CAGGATTTGCACATCCGATGAAGACATGATCAATATTACTGTTCCCTACATCAAGATATGATATG  
TTTAAGAAAAAAATTCCTCAAGATATGATATTGAGTGGGTGGAGGATGAAGATGCAAGTGTG  
ATATGTTACAGCCAGTTTCCTTTAAAGAAAGATAGCAGCTGGAAGCCTGTGGCTGTTGGCAACGA  
CACATTTACTGAGCAACAAAAGCGATCACGATTTACTTGGGAGCTTGAGAGGAGGAAAAAGCTT  
AAGCTTGAGATGAAGACAAATCCTTTGCATGAGCGGGATTTGGACTCAGATCCGAACTCATCAG  
GTTCTGACCAGATCAGAAAGTATGGTTTCAAAGTGTATGGGAGTCATAAAGTTGATAGGAAAA  
GAAGCATAACATCGCCCAAATCGGGCAAGAAACCCAGCAGCGCAATCATACTAAAGCGGCAGTCT  
CTTTTGAAGCTTTTGGTAGATAAAAATGAGTGGTGATAAAAGTTTAGCATCTTTTCCATTTGATC  
AGAATCCTCAGCTTCAGTTTATTTTCAAAGAAATGCATCCATTGGTATTTTCATTTGGAGATGA  
AGATCTAGTAGCAGCTGACAGGCCAGAGCAAGATGTTGGATTGGATATGTTATGGGCTGACTTT  
GACTTTGCTTTAGAGTCTGAGAATATCGGTACTTATTATGATGATGAGGTACATTCAGTACTGG  
TTTTCATTTTATTTTTATCTATCAAAACACATGCAGGTATAAATATGTGTGGTTTATTTATTTG  
AACACTGACTCTACAAC TAGAACTATGGTAAAATTAACAATGTCCAACCTGGAGATGCACTACCA  
TGTTATTCTCAGCAAAAAGTTTGTCAATGGCGACAAAACGCAAAAAGTTTGATGAAACAATCTCG  
ATCAAACCAAAAAA ACTCTCATTATTCACCATCTGGCACAAGGGCAAAGATGCAGGAGATGCC  
CTCTAGGGAGCAGA ACTCCAGCTATTTTTGGAGATGCACCATCAAACACATATCAGCTTTGTCA  
TTTCCAAATTGCCCATGCTCCAAGGGTGATGATCGAATTAAGCCATTTTGTTCCTCACCATTT  
TTTTCAACGGACCTTGTGAAACCTAACCATCAACCCTTGCTTCTCCCCTTGCCGATCATTCATC  
AAAGGAAACATCATCTATCTGTGGAGGACCTGCAGGCTGCAGCAGTCTAAACCAGAAATTCAT  
GCAAAAACACACAATGTGAGCAGGTGATTGATCATCTCAGCTTGATCACAAAGAGCACAGCAGG  
TAGGGTGCAGAAGACTCATCATGCATGCTGATCGGCAGTCCATTACCTATTTTGGAGTAAGTAAC  
CACAAAAGAACCAACTTTCCTGGGCCCAAGATTTTCAAATTCCTTCCCAAGACCAAGAGGA  
CAGAACCATGAAATAAACCTTATCAACAGACTTGCCATCATCTACATCTATCGTTAACAT  
AACTAACAAGAGAAGAAATAAACCATTTGAGCTCACTTTGATAGTGCAACTTCTGTGAACAA  
TATGTGCATGTGAAATGTAGCCTCCTTTTCTCAGAATGCATATATCTGTGGTGTTTGTCAAGGG  
CCTCACACTGCTGTCGTGCCATAAAGAAAGCACAGGAATCAACAATCCTTCTTCGGGAACACT  
ATTGAAGCTAGAACCAGAAATGTACAGAAAAACTATTAGGGCGTGGAATTCCTTCTGCATTT  
TTCTTCAGTTTGATCTGGCTCTATTGTTTCTCAGATCATGTCTACGTCATGGTAGTTTTTTTT

ATCGAATGCGCAGGAGAGATGCACATCATTATATTAAGAGATGAAAAGGTCCAAAATAGACCAG  
CACAAGATAGTAGAAAAGGCCCTTTATGGTGGCCAAAAGTAAGATACAGAAAATGATCCATTA  
AATCAATCATACTATAAATCCGACCGAAGAGGGTCCGCAAGGTAGTTTGCAGCTAATGTGCAGG  
AAACGTCGTTTCCCAGAATAGAGTAACTTTGTAAACATTAGAAAATGTTTTTTTTTCAGGTCAAGA  
AATCTAGTTCACTTAAAGGAGTTACTATAGAATAGTTTATAACCATTATATTAAGAAGAGATGA  
AAAGGTCCAAAATAGACCAGCACAAGATAGTACAAAAGGCCCTTTATGGCGGAGTAAGATACAG  
AAAATGATCCATTAATCAATCCTACTATAAATCCGACCGAAGAGGGGCAGCAAGGTAGTTTGC  
AGCTAATGTGCAGGAAACGTCGTTTCCCAGAATAGAGTAACTTTGTAAACATTAGAAAATGTTTT  
TTTAGGTCAAGAACTCTAGTTCACTTAAAGGAGTTACTATAGAATAGTTTATAACCATTAAGGG  
GCAATTCAGATAGCCTCAGAAGGTCAAGAAAACCTTTATCATAGCCTGTGTGAATGTTTAGACAA  
AAAGGAAGCAGAAAATGTTTGTCTTTGTCAAAGTTTCATCATCAGTGTGTTTCATTTAATGAT  
TTCCTTTTGTCCCAACATTAATGACTCAGTTACATGTTGTTTTTGCGAATGGAATTTTCTAACT  
TGGCAATGTTACTCAAACATATGTAGTATTCTGCATATCTGATACCACAGGTTGATTCCTACTC  
TTAATTCGGCAATCAACATAAATAGTTTCATCTTTTAGAACTAGACACCCCTACTGCTTTCA  
TGTAAGGTTATATAGCATTTCAAGGTCGTGCGTCCATGATATACTACTCGATTTTTAATGTTT  
ATTTTCTTGAATGCAAGAGTTTGTACCATTGCAGATACTTTGATTTGCCACTGTGAGAATGACT  
AAATGAACTTATTAGCTTATGTTGTATTGTAGTGTCAAGAAGGCAATCAACTAGATTTTTCTCT  
TGCCTCAGTAACACCCTGTTCTCGTGGGAAGCATGAATTTGTTATTGATGATCAAATAGGGATC  
AGATGCAAATACTGTTTCGTTGGTAAACCTGGAGATCAAATTCATGTTTCCATCACTGGTAAGCT  
TTATTATGGTCATAAATCATGACATCTATTCTACATAAATTTGGTCATTTAAGTCATCATTTTT  
TTTTAGGTGTCAGTGTTTGGCGAGAAATCAGCATGGCCAAATGACAAAGGCGTGAAGAATACAC  
TGATGTTTCATGATCTTTATGAACAAGGAGTCAATGACACTGAACAATCTCAAGATATTCATCA  
ATATGGAACGGTGTGGAATCTTATTCAGGGGTCATCAGTACTATGTATGAGCATCAGCGTGAA  
GCATTTGAATTTATGTGGACAAATTTAGTTGGTGATATTAGACTTGATGAGATAAAGCATGGAG  
CAAAACCTGATGTTGTTGGTGGATGTGTTATCTGTGATGCTCCTGGAACAGGAAAGACACGATT  
AGCTATTGTATTTATCCAGACATACATGAAAGTGTTCAGACTGTGCGCCAGTGATTATTGCA  
CCACGTGGTATGCTCTTTGCTTGGGATGAGGAATTTAAGAAATGGAATGTTGATGTTCTTTTC  
ATATACTAAACACAACCTGATTACACTGGAAAAGAGGACCGGGACATATGCAAGTTAATAAAGAA  
AGAACATAGGACAGAAAAGTTGACAAGACTAGTCAAACCTGCTTTCATGGAACAAAGGCCATGGT  
ATTCTTGGAAATAAGTTATGGTCTGTACACAAAACCTGACCTCTGAAAACCTGGCTGCACAGAAG  
AAAACAAAGTAAGAAGCATTCTTCTTGATAACCCTGGCTTACTTGTTCTTGATGAAGGACATAC  
ACCTAGGAATGAGCGCAGTGTATGTGGAAAACCTCTAGGAAATGTGAAAACCTGAGAAGCGTATA  
ATTTTATCTGGAACCTCTTTTTCAGAACAATTTTCTTGAGCTTTACAACATTTCTTTGTCTGGTAA  
GGCCTAGATTTGGTGAATGTTTTTTCAGCAAGTCAAGAGTAGGTGCAAGACATATATGTCTCAA  
AAAGCAAAGGATAAGTTTTCTGATAAATATGAAAAGGGTGTGTTGGGCATCACTGACTAGCAAT  
GTAACCTGATGATAATGCGGAGAAAAGTAAGATCAATATTGAAACCATTTGTTTCATATACATAATG  
GCAATATCTTCGAACTCTTCCAGGACTCAGGGAGAGTGTAATTTATTTTGAAGCCTCTTCCCCCT  
TCAAAGAGTATCATTAATAAAGGTGGAAAACATTTGGTCTGGTAACAACCTTCGAACATGAATAT  
GTCATTTCTTTAGCTTCTACACACCCTTCCCTTGTAACCGCCATTAACATGTCTGAGGAGGAAG  
CTTCACTTATTGATAAACCTATGCTTGCTAAAGTGAGATCAAATCCATATGAAGGGGTAAAAAC  
AAGATTTGTGATCGAAGTTGTTCTGTTGCTGTAAGCATTAAGAGAGAAGGTTTTGATTTTTAGC  
CAATTTATTCAGCCTCTAGAGTTGATTAAGAGCATCTTCGCAAGTTCTTCAAATGGAGAGAAG  
GGAAAGAAATTTCTCAAATGGATGGAAAGATCCTTCCAAGATATCGCCAGGCTTCCATTTGAAGC  
CTTCAATAATCCAAATAATGATTCAGGGTGTACTTGCATCTACAAGAGCATGCTGTGAAGGG  
ATTAGCTTGACAGGTGCTTCAAGAATTGTGCTTCTAGATGTTGTTTGGAAACCAGCTGTTGGAA  
GGCAAGCCATCAGCAGAGCATTTAGGATAGGTCAGAAGAAATTTGTATATACATATAATTTGAT

AACTTATGGAACAGGTGAAGGTGACAAATATGATAGGCAAGCAGAAAAGGATCACTTATCCAAG  
TTGGTCTTCTCTACAGAAGACGAGTTCAATAATGTTAGGAACATGTTATCTAAAGCTGAAATGG  
AGCACTGTTCTAAGTTTATCTCAGAAGATAAAGTTTTGGAGGAGATGACTTCCCACGATCAACT  
TAAAGGAATGTTTTGAAGATCCATTATCCACCAACTGAGTCAAACATTTGTCTATAGTTACAAT  
CAAATTGCTACTGAGTGA

>Rmr1-A619 | coding sequence | 4308 bp

ATGGATCGCGCCACGCCGCGGTTTTGCGGCCGCCGCGCGTATCCCAAGCGGCGGTGGAAGCTG  
CGCCGTCTCCTCCC GCGCGCGCCGCCGCGATAAGGCGCCGGCCGTTGTCATGGACCTTGCGGA  
CGACGACTGCGGGCGGTGGCGGGGCCAGGAAGACGGTTGGTGGCGCTGCAGGTAGGTGCGAGGGA  
TCCACGAAGGCTCCTTCGCCTATGCTGCCGCCGATGATGGTGCCGGCGGGAGCGGTGGCGCTGC  
GGACACGATCGAGGAGGCGGGCGATGCTGGCGGCGGCAGTGGTGGAAGAGGCGCCAACGAAGAA  
GAAGAAGAAGGAAGGAGCGATCCCAGATGCCGCGGAGGCAACCCGTGGCCACGGGAGCAAGGCC  
GCTGCGACCTCGATGGCGACGTCGAGCCATAAGCGGCGCGCTGGGACCTCGAGGTGACGTCGA  
GAGATAAGCGGCGCGCGCTCGGGACGTGCCTCGGAGCCAGCTCGCGTGGGCCGCGCGCGCAA  
GCGCAAAGGAACGAGTTGGAGGCCCGCTCGGAGAGAACGTGTGAAGGCGCCATGTGTCAGT  
GAAAGTGATGACAACAGCGGGCGAGGCGATGACGCTTCTCATGACGGGGATGCGGAGCCTCGCG  
GCGGGGTGCCATTGGCACTGATCTGGTTAACGGGGACCATCCGGCAGCTAAAGGGGTAGTGGA  
AGGTGCTGGTGACGAGGACACAGGGGACGGAGGGAACAGTGGCCTGGCATCGACTGCTGATGTG  
GTTGCTGAGGAGATGGCACCCCTTTGAAGATGACTACGATGATGAGATGTTGGAGGAGCAGCTTG  
TTGGAGATGTGATTCGTGCTTACAGTAATGGCAGAACTTAGATTTCAGATGGAGTGGATTGGGA  
GGCAGAGGATGAGATGGAGTTCAATGACGATGCTGACAATAGTGATTTTATGGATGATGCTGAC  
GATAGTGATTTTTATGGATGATGCTTATGAAGGTGGCAATTCCAAACCAATTCAAATCATGCTA  
AGTTGGAAATACAAGACTGGGTGAACCAGAAAGTTGTTTTGAGTGGAGGGAGGTGTGAGGTGAG  
GGGCGAGGGGGATCTGGAGGAAGAATTGGGTGTGGGAAAGGAAGCAGATGAGGAGGACGTGGAA  
CCAAAGAGTGAAGCAGCTCCAGGTTCTGATAAAAGGGTCTTGCAGTTAGAAATCCTAGGTTCCG  
ATGAGGAAATCAAGGTGCTTGAATAATGAGTAGTGCCCATCCAGGAAGGCGTCAGTTCAATC  
GAAGTTACCAACTATTCCATCTTGTGTTGCATGGAGAACCCGATCATCATGGGGGGTAAATCAA  
GATAGACTATCGTACGATACATATTTTTGAGGAATTATCTGATGAGCCAAAAGAGGATGATGATG  
ATACAGAGGTGGAACCTTGATGAAGTTGAGGATGACAACAATGACGATGACAGTAGTGATGCTTA  
TGATAAAGATGACGAAGAGAAGGAGGAAGAGGAAGAAGAGGCTGAAAGAAGAAAACCTTAATAAC  
AGGATTTGCACATCCGATGAAGACATGATCAATATTA CTGTTCTACATCAAGATATGATATGT  
TTAAGAAAAAAATTCCTCAAGATATGATATTGAGTGGGTGGAGGATGAAGATGCAAGTGTGTA  
TATGTTACAGCCAGTTTCCTTTAAGAAAGATAGCAGCTGGAAGCCTGTGGCTGTTGGCAACGAC  
ACATTTACTGAGCAACAAAAGCGATCACGATTTACTTGGGAGCTTGAGAGGAGGAAAAAGCTTA  
AGCTTGAGATGAAGACAAATCCTTTGCATGAGCGGGATTTGGACTCAGATCCGAACCTCATCAGG  
TTCTGACCAGATCAGAAAGTATGGTTTTCAAAGTGATGGGAGTCATAAAGTTGATAGGAAAAAG  
AAGCATAACATCGCCCAAATCGGGCAAGAAACCCAGCAGCGCAATCATACTAAAGCGGCAGTCTC  
TTTTGAAGCTTTTGGTAGATAAAATGAGTGGTGATAAAAGTTTAGCATCTTTTCCATTTGATCA  
GAATCCTCAGCTTCAGTTTATTTTCAAAGAAATGCATCCATTGGTATTTTCATTTGGAGATGAA  
GATCTAGTAGCAGCTGACAGGCCAGAGCAAGATGTTGGATTGGATATGTTATGGGCTGACTTTG  
ACTTTGCTTTTAGAGTCTGAGAATATCGGTACTTATTATGATGATGAGTGTCAAGAAGGCAATCA  
ACTAGATTTTTCTCTTGCCTCAGTAACACCCTGTTCTCGTGGGAAGCATGAATTTGTTATTGAT  
GATCAAATAGGGATCAGATGCAAATACTGTTTCGTTGGTAAACCTGGAGATCAAATTCATGTTTC  
CATCACTGGTGTGAGTGTGTTGGCGAGAAATCAGCATGGCCAAATGACAAAGGCGTGAAGAATAC  
ACTGATGTTTCATGATCTTTATGAACAAGGAGTCAATGACACTGAACAATCTCAAGATATTCAT

CAATATGGAACGGTGTGGAATCTTATTCCAGGGGTCATCAGTACTATGTATGAGCATCAGCGTG  
AAGCATTGGAATTTATGTGGACAAATTTAGTTGGTGATATTAGACTTGATGAGATAAAGCATGG  
AGCAAAACCTGATGTTGTTGGTGGATGTGTTATCTGTCATGCTCCTGGAACAGGAAAGACACGA  
TTAGCTATTGTATTTATCCAGACATACATGAAAGTGTTCAGACTGTCGGCCAGTGATTATTG  
CACCACGTGGTATGCTCTTTGCTTGGGATGAGGAATTTAAGAAATGGAATGTTGATGTTCCCTTT  
TCATATACTAAACACAACCTGATTACACTGGAAAAGAGGACCGGGACATATGCAAGTTAATAAAG  
AAAGAACATAGGACAGAAAAGTTGACAAGACTAGTCAAACCTGCTTTCATGGAACAAAGGCCATG  
GTATTCTTGGAAATAAGTTATGGTCTGTACACAAAACCTGACCTCTGAAAAACCTGGCTGCACAGA  
AGAAAACAAAGTAAGAAGCATTCTTCTTGATAACCCTGGCTTACTTGTCTTGATGAAGGACAT  
ACACCTAGGAATGAGCGCAGTGTTATGTGAAAACCTCTAGGAAATGTGAAAACCTGAGAAGCGTA  
TAATTTTATCTGGAACCTCCTTTTCAGAACAATTTTCTTGAGCTTTACAACATTCTTTGTCTGGT  
AAGGCCTAGATTTGGTGAAATGTTTTTGGACGAAGTCAAGAGTAGGTCGAAGACATTATGTCTCA  
AAAAAGCAAAAGGATAAGTTTTCTGATAAATATGAAAAGGGTGTTTGGGCATCACTGACTAGCA  
ATGTAACCTGATGATAATGCGGAGAAAGTAAGATCAATATTGAAACCATTTGTTTCATATACATAA  
TGGCAATATTCTTCGAACTCTTCCAGGACTCAGGGAGAGTGTAATTATTTTGAAGCCTCTTCCC  
CTTCAAAAGAGTATCATTA AAAAGGTGAAAACATTGGTTCTGGTAACAACCTTCGAACATGAAT  
ATGTCATTTCTTTAGCTTCTACACACCCTTCCCTTGTAAACCGCCATTAACATGTCTGAGGAGGA  
AGCTTCACTTATTGATAAACCTATGCTTGCTAAAGTGAGATCAAATCCATATGAAGGGGTAAAA  
ACAAGATTTGTGATCGAAGTTGTTGCTTGTCTGAAGCATTAAGAGAGAAGGTTTTGATTTTTA  
GCCAATTTATTCAGCCTCTAGAGTTGATTAAAGAGCATCTTCGCAAGTTCTTCAAATGGAGAGA  
AGGGAAAGAAATCTTCAAATGGATGGAAAGATCCTTCCAAGATATCGCCAGGCTTCCATTGAA  
GCCTTCAATAATCCAAATAATGATTCCAGGGTGTACTTGCATCTACAAGAGCATGCTGTGAAG  
GGATTAGCTTGACAGGTGCTTCAAGAATTTGTGCTTCTAGATGTTGTTTGGAAACCAGCTGTTGG  
AAGGCAAGCCATCAGCAGAGCATTTAGGATAGGTCAGAAGAAATTTGTATATACATATAATTTG  
ATAACTTATGGAACAGGTGAAGGTGACAAATATGATAGGCAAGCAGAAAAGGATCACTTATCCA  
AGTTGGTCTTCTCTACAGAAGACGAGTTCAATAATGTTAGGAACATGTTATCTAAAGCTGAAAT  
GGAGCACTGTTCTAAGTTTATCTCAGAAGATAAAGTTTTGGAGGAGATGACTTCCCACGATCAA  
CTTAAAGGAATGTTTTTGAAGATCCATTATCCACCAACTGAGTCAAACATTGTCTATAGTTACA  
ATCAAATTGCTACTGAGTGA

>Rmr1-A632 | genomic | 6393 bp

ATGGATCGCGCCACGCCGCGCGTTTTGCGGCGCCGCGGCGGTATCCCAAGCGGCGGTGGAAGCTG  
CGCCGTCTCCTCCC GCGCGCGCCGCGGATAAGGCGCCGGCCGTTGTCATGGACCTTGCGGA  
CGACGACTGCGGGCGGTGGCGGGCCAGGAAGACGGTTGGTGGCGCTGCAGGTAGGTGCGAGGGA  
TCCACGAAGGCTCCTTTGCTCTGCTGCCGCGGATGATGGTGCCGGCGGGAGCGGTGGCGCTGC  
GGACACGATCGAGGAGGCGGGCGATGCTGGCGGCGGCAGTGGTGGAAGAGGCGCCAACGAAGAA  
GAAGAAGAAGGAAGGAGCGATCCCAGATGCCGCGGAGGCGCCCCGTGGCCACGGGAGCAAGGCC  
GCTGCTACCTCGATGGCGACGTCGAGCCATAAGCGGCGCGCTGGGACCTCGAGGTCGACGTCGA  
GAGATAAGCGGCGCGCGCTCGGGACGTGCCTCGGAGCCAGCTCGCGTGGGCCGCGCGCGCAA  
GCGCAAAAGGAACGAGTTGGAGGCCCCGCTCGGAGAGAACGTGTGAAGGCGCCATGTGTCAGT  
GAAAGTGATGACAACAGCGGGCGAGGCGATGACGCTTCTCATGACGGGGATGCGGAGCCTCGCG  
TCGGGGTCCCATTTGGCACTGATCTGGTTAACGGGGATCATCCGGCAGCTAAAGGTGAGGATCA  
TATTAAGAGAAGAGTGCTGTGAATTTGAATGATGACTTGGTCTCATGTAATGCAGAGGTAGTGG  
AAGGTGCTGGTGACGAGGACACAGGGGACGGAGGGAACAGTGGCCTGGCATCGACTGCTGATGT  
GTTTGCTGAGGAGATGGCACCCCTTTGAAGATGACTACGATGATGAGATGTTGGAGGAGCAGCTT  
GTTGGAGATGTGATTCGTGCTTACAGTAATGGCAGAACTTCGATTCAGATGGAGTGGATTGGG

AGGCAGAGGATGAGATGGAGTTCAATGACGATGCTGACAATAGTGATTTTATGGATGATGCTGA  
CGATAGTGATTTTATGGATGATGCTTATGAAGGTGGCAATTCCAAACCAATTCAAATCATGCT  
AAGTTGGAAATACAAGACTGGGTGAACCAGAAAAGTTGTTTTGAGTGGAGGGAGGTGTGAGGCGA  
GGGGCGAGGGGGATCTGGAGGAAGAATTGGATGTGGGAAAGGAAGCAGATGAGGAGGACGTGGA  
ACCAAAGAGTGAAGCGGCTCCAGGTTCTGATAAAAAGGGTCTTGCGAGTTAGAAATCCTAGGTTCC  
GATGAGGAAATCAAGGTGCTTGAAAATATGAGTAGTGCCCATCCAGGAAGGCGTCAGTTCAAT  
CGAAGTTACCAACTATTCCATCTTGTGTTGCATGGAGAACCCGATCATCATGGGGGGTAAATCA  
AGATAGACTATCGTACGATACATATTTTGGAGGAATTATCTGATGAGCCAAAAGAGGATGATGAT  
GATACAGAGGTGGAACCTGATGAAGTTGAGGATGACAACAATGACGATGACAGTAGTGATGCTT  
ATGATAAAGATGACGAAGAGAAGGAGGAAGAGGAAGAAGAGGCTGAAAGAAGAAAACCTAATAA  
CAGGATTTGCACATCCGATGAAGACATGATCAATATTACTGTTCCCTACATCAAGATATGATATG  
TTTAAGAAAAAAATTCCTCAAGATATGATATTGAGTGGGTGGAGGATGAAGATGCAAGTGTG  
ATATGTTACAGCCAGTTTCTTTAAGAAAGATAGCAGCTGGAAGCCTGTGGCTGTTGGCAACGA  
CACATTTACTGAGCAACAAAAGCGATCACGATTTACTTGGGAGCTTGAGAGGAGGAAAAAGCTT  
AAGCTTGAGATGAAGACAAATCCTTTGCATGAGCGGGATTTGGACTCAGATCCGAACCTCATCAG  
GTTCTGACCAGATCAGAAAAGTATGGTTTCAAAGTGATGGGAGTCATAAAGTTGATAGGAAAA  
GAAGCATACATCGCCCAAATCGGGCAAGAAACCCAGCAGCGCAATCATACTAAAGCGGCAGTCT  
CTTTTGAAGCTTTTGGTAGATAAAAATGAGTGGTGATAAAAAGTTTAGCATCTTTTCCATTTGATC  
AGAATCCTCAGCTTCAGTTTATTTTCAAAGAAATGCATCCATTGGTATTTTCATTTGGAGATGA  
AGATCTAGTAGCAGCTGACAGGCCAGAGCAAGATGTTGGATTGGATATGTTATGGGCTGACTTT  
GACTTTGCTTTAGAGTCTGAGAATATCGGTACTTATTATGATGATGAGGTACATTCAGTACTGG  
TTTTCATTTTATTTTTATCTATCAAAACACATGCAGGTATAAATATGTGTGGTTATTTATTTG  
AACACTTACTCTACAAC TAGAACTATGGTAAAATTAACAATGTCCAACCTGGAGATGCACTACCA  
TGTTATTCTCAGCAAAAAGTTTGTCAATGGCGACAAAACGCAAAAAGTTTGATGAAACAATCTCG  
ATCAAACCAAAAAACTCTCATTATTCACCATCTGGCACAAGGGCAAAGATGCAGGAGATGCCCC  
TTGCTCTGGCCAAACCCCAATCATGCAACTCCTCTCTAGGGAGCAGAACTCCAGCTATTTTTTG  
AGATGCACCATCAAACACATATCAGCTTTGTCAATTTCAAATTGCCCATGCTCCAAGGGTGATG  
ATCGAATTAAGCCATTTTGTTCCTCACCATTTTTTTCAATGGACCTTGTGAAACCTAACCATC  
AACCTTGCTTCTCCCTTGCCGATCATTCATCAAAGGAAACATCATCTATATTTGGAGGACCT  
GCAGGCTGCAGCAGTCTAAACCAGAATTCCTAATGCAAAAACACACAATGTGAGCAGGTGATTGA  
TCATCTCAGCTTGATCACAAGAGCACAGCAGGTAGGGTGCAGAAGACTCATCATGCATGCTGA  
TCGGCAGTCCATTATCTATTATGAGTAAGTAACCACAAAAGAACCAACACTTCCTGGGGCCCAA  
GATTTTCAAATCTTTCCCAAGGCCAAGAGGACAGAACCATGAAATAAACCTTATCAACAGA  
CTTGCCTCAATCATCTACATCTATCGTTAACAATAACTAACAAGAGAAGAAATAAACCATTTGAG  
CTCACTTTGATAGTACAACACTTCTGTGAACAATATGTGCATGTGAAATGTAGCCTCGTTTTCT  
CATAATGCATATATCTGTGGTGTGTGTCAAGGGCCTCACACTGCTGTAGTGTCCATAAAGAAAG  
CACAGGAATCAACAATCCTTCTTCGGGAACACTATTGAAGCTAGAACCAGAAATGTACAGAAA  
AACTATTAGGGCATGGAAAGCATTCCTTCTGCATTTTCTTCAGTTTGATCTGGCTCTATTGTT  
TCTCAGATCATGTCTACGTCATGGTAGTTTTTTTTCTCGAATGCGCAGGAGAGATGCGCATCAT  
TATATTAAGAAGAGATGAAAAGGTCCAAAATAGACCAGCTCAAGATAGTACAAAAGGCCCTTTA  
TGGCGGCCAAAAGTAAGATACAGAAAATGATCCATTAAATCAATCCTACTATAAATCCGACCG  
AAGAGGGGCAGCAAGGTAGTTTGCAGCTAATGTGCAGGAAACGTCGTTTCCCAGAATAGAGTAA  
CTTTGTAAACATTAGAAATGTTTTTTTAGGTCAAGAAATCTAGTTCACTTAAAGGAGTACTAT  
AGAATAGTTTATAACCATAACTTTAAGGGGCAATTCAGATAGCCTCAGAAGGTCAAGAAAACCT  
TATTATAGCCTGTGTGAATGTTTAGACAAAAGGAAGCAGAAATGATTGTTCTTTGTCAAAGT  
TTCATCATCAGTGTGTTTCATTTAATGATTTCTTTTGTCCCAACATTAATGACTTAGTTACAT

GTTGTTTTTGCGAATTAATTTTCTAACTTGACGACGTTACTCAAACATATGTAGTATTCTGCA  
TATCTGATACCACAGGTTGGTTCCTACTCTTAATTCGGCAATCAACATAAATAGTTTCATCTTT  
TAGAACTAGACACCCTTACTGCTTTCATGTAAAAGTTATATAGCATTTCAAGGTCGTGCGTCC  
ATGATATACTACTCGATTTTTAATGTTTATTTTCTTAAATGCAAGAGTTTGTACCATTGTAGAT  
ACTTTGATTTGCCACTGTGAGAATGACTAAATGAACTTATTAGCTTATGTTGTATTGTAGTGTC  
AAGAAGGCAATCAACTAGATTTTTCTCTTGCCCCAGTAACACCCTGTTCTCGTGGGAAGCATGA  
ATTTGTTATTGATGATCAAATAGGGATCAGATGCAAATACTGTTCCCTGGTAAACCTGGAGATC  
AAATTCATGTTTCCATCACTGGTAAGCTTTATTATGGTCATAAATCATGACATCTATTCTACAG  
TATAAGCTTTTTAAATTTGGTCATTTAAGTCATCATTTTCTTTTAGGTGTCAGTGTTCGCCGAGA  
AATCAGCATGGCCAAATGACAAAGGCGTAAAAATACACTGATGTTTCATGATCTTTATGAACA  
AGGAGTCAATGACACTGAACAATCTCAAGATATTCATCAATATGGAACGGTGTGGAATCTTATT  
CCAGGGGTCATCAGTACTATGTATGAGCATCAGCGTGAAGCATTTGAATTTATGTGGACAAATT  
TAGTTGGTGATATTAGACTTGATGAGATAAAGCATGGAGCAAACCTGATGTTGTTGGTGGATG  
TGTTATCTGTCTGCTCCTGGAACAGGAAAGACACGATTAGCTATTGTGTTTATCCAGACATAC  
ATGAAGGTGTTTCCAGACTGTGCGCCAGTGATTATTGCACCACGTGGTATGCTCTTTGCTTGGG  
ATGAGGAATTTAAGAAATGGAATGTTGATGTTCCTTTTTCATATACTAAACACAACCTGATTACAC  
TGAAAAGAGGATCGGGAGATATGCAAGTTAATAAAGAAAGAACATAGGACAGAAAAGTTGACA  
AGACTAGTCAAACCTGCTTTCATGGAACAAAGGTCATGGTATTCTTGAATAAGTTATGGTCTGT  
ACACAAAACCTGACCTCTGAAAACCTGGCTGCACAGAAGAAAACAAAGTAAGAAGCATTTCTTCT  
TGATAACCCTGGCTTACTTGTCTTGTGATGAAGGACATACACCTAGGAATGAACGCAGTGTATG  
TGAAAACCTCTAGGAAATGTGAAAACCTGAGAAGCGTATAATTTTATCCGGAACCTCTTTTCAGA  
ACAATTTTCTTGAGCTTTACAACATTTCTTGTCTGGTAAGGCCTAGATTTGGTGAAATGTTTTT  
GACGAAGTCAAGAGTAGGTCAAGACATTTATGTCTCAAAAAGCAAAGGATAAGTTTTCTGAT  
AAATATGAAAAGGGTGTGTTGGGCATCACTGACTAGCAATGTAACCTGATGATAATGCGGAAAAG  
TAAGATCAATATTGAAACCATTTGTTTCATATAATAATGGCAATATTCTTCGAACTCTTCCAGG  
ACTCAGGGAGAGTGTAATTTATCTGAAGCCTCTTCCCCTTCAAAGAGTATCATTAAAAAGGTG  
GAAAACATTTGGTCTGGTAACAACCTCGAACATGAATATGTCATTTCTTTAGCTTCTACACACC  
CTTCCCTTGTAACCGCCATTAACATGTCTGAGGAGGAAGCTTCACTTATTGATAAACCTATGCT  
TGCTAAAGTGAGATCAAATCCATATGAAGGGGTAAAACAAGATTTGTGATCGAAGTTGTTTCGT  
TTGTCTGAAGCATTAAGAGAGAAGGTTTTGATTTTTAGCCAATTTATTCAGCCTCTAGAGTTGA  
TAAAAGAGCATCTTCGCAAGTTCTTCAAATGGAGAGAAGGGAAAGAAATTTCTTCAAATGGATGG  
AAAGATCCTTCCAAGATATCGCCAGGCTTCCATTTGAAGCCTTCAATAATCCAAATAATGATTCC  
AGGGTGTACTTGCATCTACAAGAGCATGCTGTGAAGGGATTAGCTTGACAGGTGCTTCAAGAA  
TTGTGCTTCTAGATGTTGTTTGGAAACCAGCTGTTGGAAGGCAAGCCATCAGCAGAGCATTAG  
GATAGGTCAGAAGAAATTTGTATATACATATAATTTGATAACTTATGGAACAGGTGAAGGTGAC  
AAATATGATAGGCAAGCAGAAAAGGATCACTTATCCAAGTTGGTCTTCTCTACAGAAGACGAGT  
TCAATAATGTTAGGAACATGTTATCTAAAGCTGAAATGGAGCACTGTTCTAAGTTTATCTCAGA  
AGATAAAGTTTTGAGAGGAGATGACTTCCCACGATCAACTTAAAGGAATGTTTTTGAAGATCCAT  
TATCCACCAACTGAGTCAAACATTTGTCTATAGTTACAATCAAATTTGCTACTGAGTGA

>Rmr1-A632 | coding sequence | 4308 bp

ATGGATCGCGCCACGCCGCGGTTTGCGGCCGCCGCGGCGTATCCAAGCGGCGGTGGAAGCTG  
CGCCGTCTCCTCCC GCGCGCGCCGCCGCGATAAGGCGCGGCGTGTGCATGGACCTTGGCGA  
CGACGACTGCGGCGGTGGCGGGCCAGGAAGACGGTTGGTGGCGCTGCAGGTAGGTGCGAGGGA  
TCCACGAAGGCTCCTTTGCCTCTGCTGCCGCCGATGATGGTGCCGGCGGGAGCGGTGGCGCTGC  
GGACACGATCGAGGAGGCGGGCGATGCTGGCGGCGGCAGTGGTGAAGAGGCGCCAACGAAGAA

GAAGAAGAAGGAAGGAGCGATCCCAGATGCCGCGGAGGCGCCCCGTGGCCACGGGAGCAAGGCC  
GCTGCTACCTCGATGGCGACGTCGAGCCATAAGCGGCGCGCTGGGACCTCGAGGTCGACGTCGA  
GAGATAAGCGGCGCGCGCTCGGGACGTGCCTCGGAGCCAGCTCGCGTGGGCCGCGCGCGCAA  
GCGCAAAAGGAACGAGTTGGAGGCCCCCGCTCGGAGAGAACGTGTGAAGGCGCCATGTGTCAGT  
GAAAGTGATGACAACAGCGGGCGAGGCGATGACGCTTCTCATGACGGGGATGCGGAGCCTCGCG  
TCGGGGTCGCCATTGGCACTGATCTGGTTAACGGGGATCATCCGGCAGCTAAAGGGGTAGTGGA  
AGGTGCTGGTGACGAGGACACAGGGGACGGAGGGAACAGTGGCCTGGCATCGACTGCTGATGTG  
TTTGCTGAGGAGATGGCACCCTTTGAAGATGACTACGATGATGAGATGTTGGAGGAGCAGCTTG  
TTGGAGATGTGATTCGTGCTTACAGTAATGGCAGAACTTCGATTCAGATGGAGTGGATTGGGA  
GGCAGAGGATGAGATGGAGTTCAATGACGATGCTGACAATAGTGATTTTATGGATGATGCTGAC  
GATAGTGATTTTATGGATGATGCTTATGAAGGTGGCAATTCCAAACCAATTCAAAATCATGCTA  
AGTTGGAAATACAAGACTGGGTGAACCAGAAAGTTGTTTTGAGTGGAGGGAGGTGTGAGGCGAG  
GGGCGAGGGGGATCTGGAGGAAGAATTGGATGTGGGAAAGGAAGCAGATGAGGAGGACGTGGAA  
CCAAAGAGTGAAGCGGCTCCAGGTTCTGATAAAAGGGTCTTGCAGTTAGAAATCCTAGGTTCCG  
ATGAGGAAATCAAGGTGCTTGAAAATATGAGTAGTGCCCATCCAGGAAGGCGTCAGTTCAATC  
GAAGTTACCAACTATTCCATCTTGTGTTGCATGGAGAACCCGATCATCATGGGGGGTAAATCAA  
GATAGACTATCGTACGATACATATTTTGAGGAATTATCTGATGAGCCAAAAGAGGATGATGATG  
ATACAGAGGTGGAACCTTGATGAAGTTGAGGATGACAACAATGACGATGACAGTAGTGATGCTTA  
TGATAAAGATGACGAAGAGAAGGAGGAAGAGGAAGAAGAGGCTGAAAGAAGAAAACCTTAATAAC  
AGGATTTGCACATCCGATGAAGACATGATCAATATTAAGTTTCTACATCAAGATATGATATGT  
TTAAGAAAAAAATTCCTCAAGATATGATATTGAGTGGGTGGAGGATGAAGATGCAAGTGTGTA  
TATGTTACAGCCAGTTTCCTTTAAGAAAGATAGCAGCTGGAAGCCTGTGGCTGTTGGCAACGAC  
ACATTTACTGAGCAACAAAAGCGATCACGATTTACTTGGGAGCTTGAGAGGAGGAAAAAGCTTA  
AGCTTGAGATGAAGACAAATCCTTTGCATGAGCGGGATTTGGACTCAGATCCGAACCTCATCAGG  
TTCTGACCAGATCAGAAAGTATGGTTTTCAAAGTGATGGGAGTCATAAAGTTGATAGGAAAAAG  
AAGCATAACATCGCCCAAATCGGGCAAGAAACCCAGCAGCGCAATCATACTAAAGCGGCAGTCTC  
TTTTGAAGCTTTTGGTAGATAAAAATGAGTGGTGATAAAAGTTTAGCATCTTTTCCATTTGATCA  
GAATCCTCAGCTTCAGTTTATTTTCAAAGAAATGCATCCATTGGTATTTTCATTTGGAGATGAA  
GATCTAGTAGCAGCTGACAGGCCAGAGCAAGATGTTGGATTGGATATGTTATGGGCTGACTTTG  
ACTTTGCTTTAGAGTCTGAGAATATCGGTACTTATTATGATGATGAGTGTCAAGAAGGCAATCA  
ACTAGATTTTTCTCTTGCCCCAGTAACACCCTGTTCTCGTGGGAAGCATGAATTTGTTATTGAT  
GATCAAATAGGGATCAGATGCAAATACTGTTTCTTGGTAAACCTGGAGATCAAATTCATGTTTC  
CATCACTGGTGTGAGTGTGTTTGGCGAGAAATCAGCATGGCCAAATGACAAAGGCGTGAAAAATAC  
ACTGATGTTTCATGATCTTTATGAACAAGGAGTCAATGACACTGAACAATCTCAAGATATTCAT  
CAATATGGAACGGTGTGGAATCTTATTCAGGGGTGATCAGTACTATGTATGAGCATCAGCGTG  
AAGCATTTGAATTTATGTGGACAAATTTAGTTGGTGATATTAGACTTGATGAGATAAAGCATGG  
AGCAAAACCTGATGTTGTTGGTGGATGTGTTATCTGTGATGCTCCTGGAACAGGAAAGACACGA  
TTAGCTATTGTGTTTATCCAGACATACATGAAGGTGTTTCCAGACTGTCGGCCAGTGATTATTG  
CACCACGTGGTATGCTCTTTGCTTGGGATGAGGAATTTAAGAAATGGAATGTTGATGTTCTTTT  
TCATATACTAAACACAACCTGATTACACTGGAAAAGAGGATCGGGAGATATGCAAGTTAATAAAG  
AAAGAACATAGGACAGAAAAGTTGACAAGACTAGTCAAACCTGCTTTTCATGGAACAAAGGTCATG  
GTATTCTTGAATAAGTTATGGTCTGTACACAAAACCTGACCTCTGAAAACCTGGCTGCACAGA  
AGAAAACAAAGTAAGAAGCATTCTTCTTGATAACCCTGGCTTACTTGTCTTGTGATGAAGGACAT  
ACACCTAGGAATGAACGCAGTGTTATGTGGAACCTCTAGGAAATGTGAAAACCTGAGAAGCGTA  
TAATTTTATCCGGAACCTCTTTTCAGAACAAATTTCTTGGAGCTTTACAACATCTTTTGTCTGGT  
AAGGCCTAGATTTGGTGAAATGTTTTTGACGAAGTCAAGAGTAGGTGCAAGACATTATGTCTCA

AAAAAGCAAAGGATAAGTTTTCTGATAAATATGAAAAGGGTGTGTTGGGCATCACTGACTAGCA  
ATGTAACCTGATGATAATGCGGAAAAAGTAAGATCAATATTGAAACCATTTGTTCATATACATAA  
TGGCAATATTCTTCGAACTCTTCCAGGACTCAGGGAGAGTGTAAATTATTCTGAAGCCTCTTCCC  
CTTCAAAAGAGTATCATTA AAAAGGTGGAAAACATTGGTTCTGGTAACAACCTTCGAACATGAAT  
ATGTCATTTCTTTAGCTTCTACACACCCCTTCCCTTGTAAACCGCCATTAACATGTCTGAGGAGGA  
AGCTTCACTTATTGATAAACCTATGCTTGCTAAAGTGAGATCAAATCCATATGAAGGGGTAAAA  
ACAAGATTTGTGATCGAAGTTGTTTCGTTTGTCTGAAGCATTAAGAGAGAAGGTTTTGATTTTTA  
GCCAATTTATTCAGCCTCTAGAGTTGATAAAAGAGCATCTTCGCAAGTTCTTCAAATGGAGAGA  
AGGGAAAGAAATCTTCAAATGGATGGAAAGATCCTTCCAAGATATCGCCAGGCTTCCATTGAA  
GCCTTCAATAATCCAAATAATGATTCCAGGGTGTACTTGCATCTACAAGAGCATGCTGTGAAG  
GGATTAGCTTGACAGGTGCTTCAAGAATTGTGCTTCTAGATGTTGTTTGGAAACCAGCTGTTGG  
AAGGCAAGCCATCAGCAGAGCATTTAGGATAGGTCAGAAGAAATTTGTATATACATATAATTTG  
ATAACTTATGGAACAGGTGAAGGTGACAAATATGATAGGCAAGCAGAAAAGGATCACTTATCCA  
AGTTGGTCTTCTCTACAGAAGACGAGTTCAATAATGTTAGGAACATGTTATCTAAAGCTGAAAT  
GGAGCACTGTTCTAAGTTTATCTCAGAAGATAAAGTTTTGGAGGAGATGACTTCCCACGATCAA  
CTTAAAGGAATGTTTTTGAAGATCCATTATCCACCAACTGAGTCAAACATTGTCTATAGTTACA  
ATCAAATTGCTACTGAGTGA

>rmr1-1 | coding sequence | 4308 bp

ATGGATCGCGCCACGCCGCGGTTTTGCGGCCGCCGCGGCGTATCCCAAGCGGCGGTGGAAGCTG  
CGCCGTCTCCTCCC GCGCGCGCCGCCGCGATAAGGCGCCGGCCGTTGTCATGGACCTTGCGGA  
CGACGACTGCGGGCGGTGGCGGGCCAGGAAGACGGTTGGTGGCGCTGCAGGTAGGTGCGAGGGA  
TCCACGAAGGCTCCTTCGCTATGCTGCCGCCGATGATGGTGCCGGCGGGAGCGGTGGCGCTGC  
GGACACGATCGAGGAGGCGGGCGATGCTGGCGGCGGCAGTGGTGGAAAGAGGCGCCAACGAAGAA  
GAAGAAGAAGGAAGGAGCGATCCCAGATGCCGCGGAGGCAACCCGTGGCCACGGGAGCAAGGCC  
GCTGCGACCTCGATGGCGACGTCGAGCCATAAGCGGCGCGCTGGGACCTCGAGGTGACGTCGA  
GAGATAAGCGGCGCGCGCTCGGGACGTGCCTCGGAGCCAGCTCGCGTGGGCCGCGCGCGCAA  
GCGCAAAGGAACGAGTTGGAGGCCCCCGCTCGGAGAGAACGTGTGAAGGCGCCATGTGTCAGT  
GAAAGTGATGACAACAGCGGGCGAGGCGATGACGCTTCTCATGACGGGGATGCGGAGCCTCGCG  
GCGGGGTGCCATTGGCACTGATCTGGTTAACGGGGACCATCCGGCAGCTAAAGGGGTAGTGGA  
AGGTGCTGGTACGAGGACACAGGGGACGGAGGGAACAGTGGCCTGGCATCGACTGCTGATGTG  
GTTGCTGAGGAGATGGCACCCCTTTGAAGATGACTACGATGATGAGATGTTGGAGGAGCAGCTTG  
TTGGAGATGTGATTCGTGCTTACAGTAATGGCAGAACTTAGATTTCAGATGGAGTGGATTGGGA  
GGCAGAGGATGAGATGGAGTTCAATGACGATGCTGACAATAGTGATTTTATGGATGATGCTGAC  
GATAGTGATTTTATGGATGATGCTTATGAAGGTGGCAATTCCAAACCAATTCAAAATCATGCTA  
AGTTGGAAATACAAGACTGGGTGAACCAGAAAGTTGTTTTGAGTGGAGGGAGGTGTGAGGTGAG  
GGGCGAGGGGATCTGGAGGAAGAATTGGGTGTGGAAAGGAAGCAGATGAGGAGGACGTGGAA  
CCAAAGAGTGAAGCAGCTCCAGGTTCTGATAAAAGGGTCTTGCAGTTAGAAATCCTAGGTTCCG  
ATGAGGAAATCAAGGTGCTTGA AAATATGAGTAGTGCCCATCCAGGAAGGCGTCAGTTCAATC  
GAAGTTACCAACTATTCCATCTTGTGTTGCATGGAGAACCCGATCATCATGGGGGGTAAATCAA  
GATAGACTATCGTACGATACATATTTTGAGGAATTATCTGATGAGCCAAAAGAGGATGATGATG  
ATACAGAGGTGGAACCTTGATGAAGTTGAGGATGACAACAATGACGATGACAGTAGTGATGCTTA  
TGATAAAGATGACGAAGAGAAGGAGGAAGAGGAAGAAGAGGCTGAAAGAAGAAAACCTTAATAAC  
AGGATTTGCACATCCGATGAAGACATGATCAATATTA CTGTTCCCTACATCAAGATATGATATGT  
TTAAGAAAAAAAATTCCTCAAGATATGATATTGAGTGGGTGGAGGATGAAGATGCAAGTGTTGA  
TATGTTACAGCCAGTTTCCTTAAAGAAAGATAGCAGCTGGAAGCCTGTGGCTGTTGGCAACGAC

ACATTTACTGAGCAACAAAAGCGATCACGATTTACTTGGGAGCTTGAGAGGAGGAAAAAGCTTA  
AGCTTGAGATGAAGACAAATCCTTTGCATGAGCGGGATTTGGACTCAGATCCGAACTCATCAGG  
TTCTGACCAGATCAGAAAAGTATGGTTTTCAAAGTGATGGGAGTCATAAAGTTGATAGGAAAAAG  
AAGCATAACATCGCCCAAATCGGGCAAGAAACCCAGCAGCGCAATCATACTAAAGCGGCAGTCTC  
TTTTGAAGCTTTTGGTAGATAAAAATGAGTGGTGATAAAAAGTTTAGCATCTTTTCCATTTGATCA  
GAATCCTCAGCTTCAGTTTATTTTCAAAGAAATGCATCCATTGGTATTTTCATTTGGAGATGAA  
GATCTAGTAGCAGCTGACAGGCCAGAGCAAGATGTTGGATTGGATATGTTATGGGCTGACTTTG  
ACTTTGCTTTAGAGTCTGAGAATATCGGTACTTATTATGATGATGAGTGTCAAGAAGGCAATCA  
ACTAGATTTTTCTCTTGCCTCAGTAACACCCTGTTCTCGTGGGAAGCATGAATTTGTTATTGAT  
GATCAAAATAGGGATCAGATGCAAATACTGTTTCGTTGGTAAACCTGGAGATCAAATTCATGTTTC  
CATCACTGGTGTGAGTGTGTTGGCGAGAAATCAGCATGGCCAAATGACAAAGGCGTGAAGAATAC  
ACTGATGTTTCATGATCTTTATGAACAAGGAGTCAATGACACTGAACAATCTCAAGATATTCAT  
CAATATGGAACGGTGTGGAATCTTATTCCAGGGGTGATCAGTACTATGTATGAGCATCAGCGTG  
AAGCATTGAAATTTATGTGGACAAATTTAGTTGGTGATATTAGACTTGATGAGATAAAGCATGG  
AGCAAAACCTGATGTTGTTGGTGGATGTGTTATCTGTCATGCTCCTGGAACAGGAAAGACACGA  
TTAGCTATTGTATTTATCCAGACATACATGAAAGTGTTCAGACTGTCGGCCAGTGATTATTG  
CACCACGTGGTATGCTCTTTGCTTGGGATGAGGAATTTAAGAAATGGAATGTTGATGTTCCCTTT  
TCATATACTAAACACAACCTGATTACACTGGAAAAGAGGACCGGGACATATGCAAGTTAATAAAG  
AAAGAACATAGGACAGAAAAGTTGACAAGACTAGTCAAACCTGCTTTCATGGAACAAAGGCCATG  
GTATTCTTGGAAATAAGTTATGGTCTGTACACAAAACCTGACCTCTGAAAAACCTGGCTGCACAGA  
AGAAAACAAAGTAAGAAGCATTCTTCTTGATAACCCTGGCTTACTTGTCTTTGATGAAGGACAT  
ACACCTAGGAATGAGCGCAGTGTATGTGGAACCTCTAGGAAATGTGAAAACCTGAGAAGCGTA  
TAATTTTATCTGGAACCTCCTTTTCAGAACAATTTTCTTGAGCTTTACAACATTCCTTGTCTGGT  
AAGGCCTAGATTTGGTGAAATGTTTTTGACGAAGTCAAGAGTAGGTGCAAGACATTATGTCTCA  
AAAAAGCAAAAGGATAAGTTTTCTGATAAATATGAAAAGGGTGTTTGGGCATCACTGACTAGCA  
ATGTAACCTGATGATAATGCGGAGAAAGTAAGATCAATATTGAAACCATTTGTTTCATATACATAA  
TGGCAATATTCTTCGAACTCTTCCAGGACTCAGGGAGAGTGTAATTATTTTGAAGCCTCTTCCC  
CTTCAAAGAGTATCATTA AAAAGGTGGAACACTTGGTTCTGGTAACAACCTTCGAACATGAAT  
ATGTCATTTCTTTAGCTTCTACACACCCTTCCCTTGTAAACCGCCATTAACATGTCTGAGGAGGA  
AGCTTCACTTATTGATAAACCTATGCTTGCTAAAGTGAGATCAAATCCATATGAAGGGGTAAAA  
ACAAGATTTGTGATCGAAGTTGTTTCGTTTGTCTGAAGCATTAAGAGAGAAGGTTTTGATTTTTA  
GCCAATTTATTCAGCCTCTAGAGTTGATTAAAGAGCATCTTCGCAAGTTCTTCAAATGGAGAGA  
AGGGAAAGAAATCTTCAAATGGATGGAAAGATCCTTCCAAGATATCGCCAGGCTTCCATTGAA  
GCCTTCAATAATCCAAATAATGATTCCAGGGTGTACTTGCATCTACAAGAGCATGCTGTGAAG  
GGATTAGCTTGACAGGTGCTTCAAGAATGTGCTTCTAGATGTTGTTTGGAAACCCAGTTGTTGG  
AAGGCAAGCCATCAGCAGAGCATTTAGGATAGGTGAGAAGAAATTTGTATATACATATAATTTG  
ATAACTTATGGAACAGGTGAAGGTGACAAATATGATAGGCAAGCAGAAAAGGATCACTTATCCA  
AGTTGGTCTTCTCTACAGAAGACGAGTTCAATAATGTTAGGAACATGTTATCTAAAGCTGAAAT  
GGAGCACTGTTCTAAGTTTATCTCAGAAGATAAAGTTTTGGAGGAGATGACTTCCCACGATCAA  
CTTAAAGGAATGTTTTTGAAGATCCATTATCCACCAACTGAGTCAAACATTGTCTATAGTTACA  
ATCAAATTGCTACTGAGTGA

>rmr1-2 | coding sequence | 4308 bp

ATGGATCGCGCCACGCCGCGCGTTTTGCGGCCGCCGCGCGGTATCCAAGCGGCGGTGGAAGCTG  
CGCCGTCTCCTCCC GCGCGCGCCGCCGCGATAAGGCGCCGGCCGTTGTCATGGACCTTGGCGA  
CGACGACTGCGGCGGTGGCGGGCCAGGAAGACGGTTGGTGGCGCTGCAGGTAGGTGCGAGGGA

TCCACGAAGGCTCCTTCGCCTATGCTGCCGCCGATGATGGTGCCGGCGGGAGCGGTGGCGCTGC  
GGACACGATCGAGGAGGCGGGCGATGCTGGCGGCGGCAGTGGTGGAAAGAGGCGCCAACGAAGAA  
GAAGAAGAAGGAAGGAGCGATCCCAGATGCCGCGGAGGCAACCCGTGGCCACGGGAGCAAGGCC  
GCTGCGACCTCGATGGCGACGTCGAGCCATAAGCGGCGCGCTGGGACCTCGAGGTCGACGTCGA  
GAGATAAGCGGCGCGCGCTCGGGACGTGCCTCGGAGCCAGCTCGCGTGGGCCGCGCGCGCAA  
GCGCAAAGGAACGAGTTGGAGGCCCGCTCGGAGAGAACGTGTGAAGGCGCCATGTGTCAGT  
GAAAGTGATGACAACAGCGGGCGAGGCGATGACGCTTCTCATGACGGGGATGCGGAGCCTCGCG  
GCGGGGTCGCCATTGGCACTGATCTGGTTAACGGGGACCATCCGGCAGCTAAAGGGGTAGTGGA  
AGGTGCTGGTGACGAGGACACAGGGGACGGAGGGAACAGTGGCCTGGCATCGACTGCTGATGTG  
GTTGCTGAGGAGATGGCACCCTTTGAAGATGACTACGATGATGAGATGTTGGAGGAGCAGCTTG  
TTGGAGATGTGATTCGTGCTTACAGTAATGGCAGAACTTAGATTCAGATGGAGTGGATTGGGA  
GGCAGAGGATGAGATGGAGTTCAATGACGATGCTGACAATAGTGATTTTATGGATGATGCTGAC  
GATAGTGATTTTATGGATGATGCTTATGAAGGTGGCAATTCCAAACCAATTCAAAATCATGCTA  
AGTTGGAAATACAAGACTGGGTGAACCAGAAAGTTGTTTTGAGTGGAGGGAGGTGTGAGGTGAG  
GGCGAGGGGGATCTGGAGGAAGAATTGGGTGTGGGAAAGGAAGCAGATGAGGAGGACGTGGAA  
CCAAAGAGTGAAGCAGCTCCAGGTTCTGATAAAAGGGTCTTGCAAGTTAGAAATCCTAGGTTCCG  
ATGAGGAAATCAAGGTGCTTGAATAATGAGTAGTGCCCATCCAGGAAGGCGTCAGTTCAATC  
GAAGTTACCAACTATTCCATCTTGTGTTGCATGGAGAACCCGATCATCATGGGGGGTAAATCAA  
GATAGACTATCGTACGATACATATTTTGAGGAATTATCTGATGAGCCAAAAGAGGATGATGATG  
ATACAGAGGTGGAACTTGATGAAGTTGAGGATGACAACAATGACGATGACAGTAGTGATGCTTA  
TGATAAAGATGACGAAGAGAAGGAGGAAGAGGAAGAAGAGGCTGAAAGAAGAAAACCTAATAAC  
AGGATTTGCACATCCGATGAAGACATGATCAATATTAAGTTCTTACATCAAGATATGATATGT  
TTAAGAAAAAAATTCCTCAAGATATGATATTGAGTGGGTGGAGGATGAAGATGCAAGTGTGTA  
TATGTTACAGCCAGTTTCTTTAAGAAAGATAGCAGCTGGAAGCCTGTGGCTGTTGGCAACGAC  
ACATTTACTGAGCAACAAAAGCGATCACGATTTACTTGGGAGCTTGAGAGGAGGAAAAAGCTTA  
AGCTTGAGATGAAGACAAATCCTTTGCATGAGCGGGATTTGGACTCAGATCCGAACTCATCAGG  
TTCTGACCAGATCAGAAAGTATGGTTTTCAAAGTGATGGGAGTCATAAAGTTGATAGGAAAAAG  
AAGCATAACATCGCCCAAATCGGGCAAGAAACCCAGCAGCGCAATCATACTAAAGCGGCAGTCTC  
TTTTGAAGCTTTTGGTAGATAAAATGAGTGGTGATAAAAGTTTAGCATCTTTTCCATTTGATCA  
GAATCCTCAGCTTCAGTTTATTTTCAAAGAAATGCATCCATTGGTATTTTCAATTTGGAGATGAA  
GATCTAGTAGCAGCTGACAGGCCAGAGCAAGATGTTGGATTGGATATGTTATGGGCTGACTTTG  
ACTTTGCTTTAGAGTCTGAGAATATCGGTACTTATTATGATGATGAGTGTCAAGAAGGCAATCA  
ACTAGATTTTTCTCTTGCCTCAGTAACACCCTGTTCTCGTGGGAAGCATGAATTTGTTATTGAT  
GATCAAAATAGGGATCAGATGCAAATACTGTTTCGTTGGTAAACCTGGAGATCAAATTCATGTTTC  
CATCACTGGTGTGAGTGTGTTGGCGAGAAATCAGCATGGCCAAATGACAAAGGCGTGAAGAATAC  
ACTGATGTTTCATGATCTTTATGAACAAGGAGTCAATGACACTGAACAATCTCAAGATATTCAT  
CAATATGGAACGGTGTGGAATCTTATTCCAGGGGTCAATCAGTACTATGTATGAGCATCAGCGTG  
AAGCATTTGAATTTATGTGGACAAATTTAGTTGGTGATATTAGACTTGATGAGATAAAGCATGG  
AGCAAAACCTGATGTTGTTGGTGGATGTGTTATCTGTCATGCTCCTGGAACAGGAAAGACACGA  
TTAGCTATTTGATTTATCCAGACATACATGAAAGTGTTCAGACTGTCGGCCAGTGATTATTG  
CACCACGTGGTATGCTCTTTGCTTGGGATGAGGAATTTAAGAAATGGAATGTTGATGTTCCCTTT  
TCATATACTAAACACAACCTGATTACACTGGAAAAGAGGACCGGGACATATGCAAGTTAATAAAG  
AAAGAACATAGGACAGAAAAGTTGACAAGACTAGTCAAACCTGCTTTCATGGAACAAAGGCCATG  
GTATTCTTGAATAAGTTATGGTCTGTACACAAAACCTGACCTCTGAAAAACCTGGCTGCACAGA  
AGAAAACAAAGTAAGAAGCATTCTTCTTGATAACCCTGGCTTACTTGTCTTGTGATGAAGGACAT  
ACACCTAGGAATGAGCGCAATGTTATGTGAAAACCTTAGGAAATGTGAAAACCTGAGAAGCGTA

TAATTTTATCTGGAACCTCTTTTCAGAACAATTTTCTTGAGCTTTACAACATTCTTTGTCTGGT  
AAGGCCTAGATTTGGTGAAATGTTTTTGACGAAGTCAAGAGTAGGTTCGAAGACATTATGTCTCA  
AAAAAGCAAAGGATAAGTTTTCTGATAAATATGAAAAGGGTGTGGGCATCACTGACTAGCA  
ATGTAACCTGATGATAATGCGGAGAAAAGTAAGATCAATATTGAAACCATTTGTTCATATACATAA  
TGGCAATATTCTTCGAACTCTTCCAGGACTCAGGGAGAGTGTAATTATTTTGAAGCCTCTTCCC  
CTTCAAAGAGTATCATTAATAAGGTGGAAAACATTGGTTCTGGTAACAACCTTCGAACATGAAT  
ATGTCATTTCTTTAGCTTCTACACACCCTTCCCTTGTAACCGCCATTAACATGTCTGAGGAGGA  
AGCTTCACTTATTGATAAACCTATGCTTGCTAAAGTGAGATCAAATCCATATGAAGGGGTAAAA  
ACAAGATTTGTGATCGAAGTTGTTTCGTTTGTCTGAAGCATTAAAGAGAGAAGGTTTTGATTTTGA  
GCCAATTTATTCAGCCTCTAGAGTTGATTAAGAGCATCTTCGCAAGTTCTTCAAATGGAGAGA  
AGGGAAAGAAATTTCAAATGGATGGAAAGATCCTTCCAAGATATCGCCAGGCTTCCATTGAA  
GCCTTCAATAATCCAAATAATGATTCCAGGGTGTACTTGCATCTACAAGAGCATGCTGTGAAG  
GGATTAGCTTGACAGGTGCTTCAAGAATTGTGCTTCTAGATGTTGTTTGAACCCAGCTGTTGG  
AAGGCAAGCCATCAGCAGAGCATTTAGGATAGGTCAGAAGAAATTTGTATATACATATAAATTTG  
ATACTTATGGAACAGGTGAAGGTGACAAATATGATAGGCAAGCAGAAAAGGATCACTTATCCA  
AGTTGGTCTTCTCTACAGAAGACGAGTTCAATAATGTTAGGAACATGTTATCTAAAGCTGAAAT  
GGAGCACTGTTCTAAGTTTATCTCAGAAGATAAAGTTTGGAGGAGATGACTTCCACGATCAA  
CTTAAAGGAATGTTTTTGAAGATCCATTATCCACCAACTGAGTCAAACATTGTCTATAGTTACA  
ATCAAATTGCTACTGAGTGA

>rmr1-3 | coding sequence | 4308 bp

ATGGATCGCGCCACGCCGCGCGTTCGCGGCCGCGCGCGTATCCCAAGCGGCGGTGGAAGCTG  
CGCCGTCTCCTCCC GCGCGCGCCGCGCGATAAGGCGCCGCGCGTTGTTCATGGACCTTGGCGA  
CGACGACTGCGGCGGTGGCGGGCCAGGAAGACGGTTGGTGGCGCTGCAGGTAGGTGCGAGGGA  
TCCACGAAGGCTCCTTCGCCTATGCTGCCGCCGATGATGGTGCCGCGGGAGCGGTGGCGCTGC  
GGACACGATCGAGGAGGCGGGCGATGCTGGCGGCGGCAGTGGTGGAAAGAGGCGCCAACGAAGAA  
GAAGAAGAAGGAAGGAGCGATCCCAGATGCCGCGGAGGCAACCCGTGGCCACGGGAGCAAGGCC  
GCTGCGACCTCGATGGCGACGTCGAGCCATAAGCGGCGCGCTGGGACCTCGAGGTTCGACGTCGA  
GAGATAAGCGGCGCGCGCTCGGGACGTGCCTCGGAGCCAGCTCGCGTGGGCGCGCGCGCAA  
GCGCAAAGGAACGAGTTGGAGGCCCGCTCGGAGAGAACGTGTGAAGGCGCCATGTGTCACT  
GAAAGTGATGACAACAGCGGGCGAGGCGATGACGCTTCTCATGACGGGGATGCGGAGCCTCGCG  
GCGGGGTGCCATTTGGCACTGATCTGGTTAACGGGGACCATCCGGCAGCTAAAGGGGTAGTGGA  
AGGTGCTGGTGACGAGGACACAGGGGACGGAGGGAACAGTGGCCTGGCATCGACTGCTGATGTG  
GTTGCTGAGGAGATGGCACCCCTTTGAAGATGACTACGATGATGAGATGTTGGAGGAGCAGCTTG  
TTGGAGATGTGATTCGTGCTTACAGTAATGGCAGAACTTAGATTCAGATGGAGTGGATTGGGA  
GGCAGAGGATGAGATGGAGTTCAATGACGATGCTGACAATAGTGATTTTATGGATGATGCTGAC  
GATAGTGATTTTATGGATGATGCTTATGAAGGTGGCAATTCCAAACCAATTCAAAATCATGCTA  
AGTTGGAAATACAAGACTGGGTGAACCAGAAAGTTGTTTTGAGTGGAGGGAGGTGTGAGGTGAG  
GGCGAGGGGGATCTGGAGGAAGAATTGGGTGTGGGAAAGGAAGCAGATGAGGAGGACGTGGAA  
CCAAAGAGTGAAGCAGCTCCAGGTTCTGATAAAAAGGGTCTTGCAAGTTAGAAATCCTAGGTTCCG  
ATGAGGAAATCAAGGTGCTTGAATAATAGAGTAGTGCCCATCCAGGAAGGCGTCAGTTCAATC  
GAAGTTACCAACTATTCCATCTTGTGTTGCATGGAGAACCTGATCATCATGGGGGGTAAATCAA  
GATAGACTATCGTACGATACATATTTTGGAGGAATTATCTGATGAGCCAAAAGAGGATGATGATG  
ATACAGAGGTGGAACCTTGATGAAGTTGAGGATGACAACAATGACGATGACAGTAGTGATGCTTA  
TGATAAAGATGACGAAGAGAAGGAGGAAGAGGAAGAAGAGGCTGAAAGAAGAAAACCTAATAAC  
AGGATTTGCACATCCGATGAAGACATGATCAATATTACTGTTCTACATCAAGATATGATATGT

TTAAGAAAAAAAAATTCCTCAAGATATGATATTGAGTGGGTGGAGGATGAAGATGCAAGTGTGGA  
TATGTTACAGCCAGTTTCCTTTAAGAAAGATAGCAGCTGGAAGCCTGTGGCTGTTGGCAACGAC  
ACATTTACTGAGCAACAAAAGCGATCACGATTTACTTGGGAGCTTGAGAGGAGGAAAAAGCTTA  
AGCTTGAGATGAAGACAAATCCTTTGCATGAGCGGGATTTGGACTCAGATCCGAACTCATCAGG  
TTCTGACCAGATCAGAAAGTATGGTTTCAAAGTATGATGGGAGTCATAAAGTTGATAGGAAAAAG  
AAGCATAACATCGCCCAAATCGGGCAAGAAACCCAGCAGCGCAATCATACTAAAGCGGCAGTCTC  
TTTTGAAGCTTTTGGTAGATAAAAATGAGTGGTGATAAAAAGTTTAGCATCTTTCCATTTGATCA  
GAATCCTCAGCTTCAGTTTATTTTCAAAGAAATGCATCCATTGGTATTTTCATTTGGAGATGAA  
GATCTAGTAGCAGCTGACAGGCCAGAGCAAGATGTTGGATTGGATATGTTATGGGCTGACTTTG  
ACTTTGCTTTAGAGTCTGAGAATATCGGTACTTATTATGATGATGAGTGTCAAGAAGGCAATCA  
ACTAGATTTTTCTCTTGCCTCAGTAACACCCTGTTCTCGTGGGAAGCATGAATTTGTTATTGAT  
GATCAAAATAGGGATCAGATGCAAATACTGTTTCGTTGGTAAACCTGGAGATCAAATTCATGTTTC  
CATCACTGGTGTGAGTGTGGCGAGAAATCAGCATGGCCAAATGACAAAGGCGTGAAGAATAC  
ACTGATGTTTCATGATCTTTATGAACAAGGAGTCAATGACACTGAACAATCTCAAGATATTCAT  
CAATATGGAACGGTGTGGAATCTTATTCCAGGGTTCATCAGTACTATGTATGAGCATCAGCGTG  
AAGCATTTGAATTTATGTGGACAAATTTAGTTGGTGATATTAGACTTGATGAGATAAAGCATGG  
AGCAAAACCTGATGTTGTTGGTGGATGTGTTATCTGTCATGCTCCTGGAACAGGAAAGACACGA  
TTAGCTATTGTATTTATCCAGACATACATGAAAGTGTTCAGACTGTCGGCCAGTGATTATTG  
CACCACGTGGTATGCTCTTTGCTTGGGATGAGGAATTTAAGAAATGGAATGTTGATGTTCTTTT  
TCATATACTAAACACAACCTGATTACACTGGAAAAGAGGACCGGGACATATGCAAGTTAATAAAG  
AAAGAACATAGGACAGAAAAGTTGACAAGACTAGTCAAACCTGCTTTCATGGAACAAAGGCCATG  
GTATTCTTGGAATAAGTTATGGTCTGTACACAAAACCTGACCTCTGAAAAACCTGGCTGCACAGA  
AGAAAACAAAGTAAGAAGCATTCCTTCTTGATAACCCTGGCTTACTTGTCTTGTGATGAAGGACAT  
ACACCTAGGAATGAGCGCAGTGTATGTGGAAAACCTTAGGAAATGTGAAAACCTGAGAAGCGTA  
TAATTTTATCTGGAACCTCCTTTTCAGAACAATTTTCTTGAGCTTTACAACATTCCTTTGTCTGGT  
AAGGCCTAGATTTGGTGAAATGTTTTTGACGAAGTCAAGAGTAGGTGCAAGACATTATGTCTCA  
AAAAAGCAAAGGATAAGTTTTCTGATAAATATGAAAAGGGTGTTTGGGCATCACTGACTAGCA  
ATGTAACCTGATGATAATGCGGAGAAAAGTAAGATCAATATTGAAACCATTTGTTTCATATACATAA  
TGGCAATATTCCTCGAACTCTTCCAGGACTCAGGGAGAGTGTAAATTAATTTGAAGCCTCTTCCC  
CTTCAAAGAGTATCATTA AAAAGGTGGA AAACATTGGTTCTGGTAACAACCTTCGAACATGAAT  
ATGTCATTTCTTTAGCTTCTACACACCCTTCCCTTGTAAACCGCCATTAACATGTCTGAGGAGGA  
AGCTTCACTTATTGATAAACCTATGCTTGTAAAGTGAGATCAAATCCATATGAAGGGGTAAAA  
ACAAGATTTGTGATCGAAGTTGTTTCGTTTGTCTGAAGCATTAAAGAGAGAAGGTTTTGATTTTTA  
GCCAATTTATTCAGCCTCTAGAGTTGATTAAGAGCATCTTCGCAAGTTCTTCAAATGGAGAGA  
AGGGAAAGAAATTCCTCAAATGGATGGAAAGATCCTTCCAAGATATCGCCAGGCTTCCATTGAA  
GCCTTCAATAATCCAAATAATGATTCCAGGGTGTACTTGCATCTACAAGAGCATGCTGTGAAG  
GGATTAGCTTGACAGGTGCTTCAAGAATTGTGCTTCTAGATGTTGTTTGGAAACCAGCTGTTGG  
AAGGCAAGCCATCAGCAGAGCATTTAGGATAGGTGAGAAGAAATTTGTATATACATATAAATTTG  
ATAACTTATGGAACAGGTGAAGGTGACAAATATGATAGGCAAGCAGAAAAGGATCACTTATCCA  
AGTTGGTCTTCTCTACAGAAGACGAGTTCAATAATGTTAGGAACATGTTATCTAAAGCTGAAAT  
GGAGCACTGTTCTAAGTTTATCTCAGAAGATAAAGTTTTGGAGGAGATGACTTCCACGATCAA  
CTTAAAGGAATGTTTTTTGAAGATCCATTATCCACCAACTGAGTCAAACATTGTCTATAGTTACA  
ATCAAATTGCTACTGAGTGA

>rmr1-4 | coding sequence | 4308 bp

ATGGATCGCGCCACGCCGCGCGT T T T GCGGCCGCCGCGCGGTATCCCAAGCGGCGGTGGAAGCTG  
CGCCGTCTCTCTCCCGCGCGCGCCGCCGCGATAAGGCGCCGGCCGTTGTTCATGGACCTTGGCGA  
CGACGACTGCGGCGGTGGCGGGCCAGGAAGACGGTTGGTGGCGCTGCAGGTAGGTGCGAGGGA  
TCCACGAAGGCTCCTTCGCCTATGCTGCCGCCGATGATGGTGCCGGCGGGAGCGGTGGCGCTGC  
GGACACGATCGAGGAGGCGGGCGATGCTGGCGGCGGCAGTGGTGGAAAGAGGCGCCAACGAAGAA  
GAAGAAGAAGGAAGGAGCGATCCCAGATGCCGCGGAGGCAACCCGTGGCCACGGGAGCAAGGCC  
GCTGCGACCTCGATGGCGACGTCGAGCCATAAGCGGCGCGCTGGGACCTCGAGGTTCGACGTCGA  
GAGATAAGCGGCGCGCGCTCGGGACGTGCCCTCGGAGCCAGCTCGCGTGGGCCGCGCGCGCAA  
GCGCAAAGGAACGAGTTGGAGGCCCCCGCTCGGAGAGAACGTGTGAAGGCGCCATGTGTCACT  
GAAAGTGATGACAACAGCGGGCGAGGCGATGACGCTTCTCATGACGGGGATGCGGAGCCTCGCG  
GCGGGGTGCCCATTTGGCACTGATCTGGTTAACGGGGACCATCCGGCAGCTAAAGGGGTAGTGGA  
AGGTGCTGGTACGAGGACACAGGGGACGGAGGGAACAGTGGCCTGGCATCGACTGCTGATGTG  
GTTGCTGAGGAGATGGCACCCCTTTGAAGATGACTACGATGATGAGATGTTGGAGGAGCAGCTTG  
TTGGAGATGTGATTCGTGCTTACAGTAATGGCAGAACTTAGATTTCAGATGGAGTGGATTGGGA  
GGCAGAGGATGAGATGGAGTTCAATGACGATGCTGACAATAGTGATTTTATGGATGATGCTGAC  
GATAGTGATTTTATGGATGATGCTTATGAAGGTGGCAATTCCAAACCAATTCAAAATCATGCTA  
AGTTGGAAATACAAGACTGGGTGAACCAGAAAGTTGTTTTGAGTGGAGGGAGGTGTGAGGTGAG  
GGGCGAGGGGGATCTGGAGGAAGAATTGGGTGTGGGAAAGGAAGCAGATGAGGAGGACGTGGAA  
CCAAAGAGTGAAGCAGCTCCAGGTTCTGATAAAAGGGTCTTGCAGTTAGAAATCCTAGGTTCCG  
ATGAGGAAATCAAGGTGCTTGAATAATGAGTAGTGCCCATCCAGGAAGGCGTCAGTTCAATC  
GAAGTTACCAACTATTCCATCTTGTGTTGCATGGAGAACCCGATCATCATGGGGGGTAAATCAA  
GATAGACTATCGTACGATACATATTTTGAGGAATTATCTGATGAGCCAAAAGAGGATGATGATG  
ATACAGAGGTGGAACCTTGATGAAGTTGAGGATGACAACAATGACGATGACAGTAGTGATGCTTA  
TGATAAAGATGACGAAGAGAAGGAGGAAGAGGAAGAAGAGGCTGAAAGAAGAAAACCTTAATAAC  
AGGATTTGCACATCCGATGAAGACATGATCAATATTAAGTTTCTTACATCAAGATATGATATGT  
TTAAGAAAAAAATTCCTCAAGATATGATATTTGAGTGGGTGGAGGATGAAGATGCAAGTGTGTA  
TATGTTACAGCCAGTTTCTTTAAGAAAGATAGCAGCTGGAAGCCTGTGGCTGTTGGCAACGAC  
ACATTTACTGAGCAACAAAAGCGATCACGATTTACTTGGGAGCTTGAGAGGAGGAAAAAGCTTA  
AGCTTGAGATGAAGACAAATCCTTTGCATGAGCGGGATTTGGACTCAGATCCGAACTCATCAGG  
TTCTGACCAGATCAGAAAGTATGGTTTTCAAAGTGATGGGAGTCATAAAGTTGATAGGAAAAAG  
AAGCATAACATCGCCCAAATCGGGCAAGAAACCAGCAGCGCAATCATACTAAAGCGGCAGTCTC  
TTTTGAAGCTTTTGGTAGATAAAATGAGTGGTGATAAAAGTTTAGCATCTTTTCCATTTGATCA  
GAATCCTCAGCTTCAGTTTATTTTCAAAGAAATGCATCCATTGGTATTTTCATTTGGAGATGAA  
GATCTAGTAGCAGCTGACAGGCCAGAGCAAGATGTTGGATTGGATATGTTATGGGCTGACTTTG  
ACTTTGCTTTAGAGTCTGAGAATATCGGTACTTATTATGATGATGAGTGTCAAGAAGGCAATCA  
ACTAGATTTTTCTCTTGCCTCAGTAACACCCTGTTCTCGTGGGAAGCATGAATTTGTTATTGAT  
GATCAAATAGGGATCAGATGCAAATACTGTTTCGTTGGTAAACCTGGAGATCAAATTCATGTTTC  
CATCACTGGTGTGAGTGTTTGGCGAGAAATCAGCATGGCCAAATGACAAAGGCGTGAAGAATAC  
ACTGATGTTTCATGATCTTTATGAACAAGGAGTCAATGACACTGAACAATCTCAAGATATTCAT  
CAATATGGAACGGTGTGGAATCTTATTCCAGGGGTATCAGTACTATGTATGAGCATCAGCGTG  
AAGCATTTGAATTTATGTGGACAAATTTAGTTGGTGATATTAGACTTGATGAGATAAAGCATGG  
AGCAAACCTGATGTTGTTGGTGGATGTGTTATCTGTTCATGCTCCTGGAACAGGAAAGACACGA  
TTAGCTATTTGATTTTATCCAGACATACATGAAAGTGTTCAGACTGTCGGCCAGTGATTATTG  
CACCACGTGGTATGCTCTTTGCTTGGGATGAGGAATTTAAGAAATGGAATGTTGATGTTCCCTTT  
TCATATACTAAACACAACCTGATTACACTGGAAAAGAGGACCGGGACATATGCAAGTTAATAAAG  
AAAGAACATAGGACAGAAAAGTTGACAAGACTAGTCAAACCTGCTTTCATGGAACAAAGGCCATG

GTATTCTTGGAAATAAGTTATGGTCTGTACACAAAACCTGACCTCTGAAAAACCTGGCTGCACAGA  
AGAAAACAAAGTAAGAAGCATTCTTCTTGATAACCCTGGCTTACTTGTTCTTGATGAAGGACAT  
ACACCTAGGAATGAGCGCAGTGTTATGTGGAAAACCTAGGAAATGTGAAAACCTGAGAAGCGTA  
TAATTTTATCTAGAACTCCTTTTCAGAACAATTTTCTTGAGCTTTACAACATTCTTTGTCTGGT  
AAGGCCTAGATTTGGTGAAATGTTTTTGACGAAGTCAAGAGTAGGTTCGAAGACATTATGTCTCA  
AAAAAGCAAAGGATAAGTTTTCTGATAAATATGAAAAGGGTGTGGGCATCACTGACTAGCA  
ATGTAACCTGATGATAATGCGGAGAAAAGTAAGATCAATATTGAAACCATTTGTTCATATACATAA  
TGGCAATATTCTTCGAACTCTTCCAGGACTCAGGGAGAGTGTAATTATTTTGAAGCCTCTTCCC  
CTTCAAAGAGTATCATTA AAAAGGTGGAAAACATTGGTTCTGGTAACAACCTTCGAACATGAAT  
ATGTCATTTCTTTAGCTTCTACACACCCTTCCCTTGTAACCGCCATTAACATGTCTGAGGAGGA  
AGCTTCACTTATTGATAAACCTATGCTTGCTAAAGTGAGATCAAATCCATATGAAGGGGTAAAA  
ACAAGATTTGTGATCGAAGTTGTTTCGTTTGTCTGAAGCATTAAGAGAGAAGGTTTTGATTTTTA  
GCCAATTTATTCAGCCTCTAGAGTTGATTAAAGAGCATCTTCGCAAGTTCTTCAAATGGAGAGA  
AGGGAAAGAAATCTTCAAATGGATGGAAAGATCCTTCCAAGATATCGCCAGGCTTCCATTGAA  
GCCTTCAATAATCCAAATAATGATTCCAGGGTGTACTTGTCATCTACAAGAGCATGCTGTGAAG  
GGATTAGCTTGACAGGTGCTTCAAGAATTGTGCTTCTAGATGTTGTTTGGAAACCCAGCTGTTGG  
AAGGCAAGCCATCAGCAGAGCATTTAGGATAGGTTCAGAAGAAATTTGTATATACATATAATTTG  
ATAACTTATGGAACAGGTGAAGGTGACAAATATGATAGGCAAGCAGAAAAGGATCACTTATCCA  
AGTTGGTCTTCTCTACAGAAGACGAGTTCAATAATGTTAGGAACATGTTATCTAAAGCTGAAAT  
GGAGCACTGTTCTAAGTTTATCTCAGAAGATAAAGTTTTGGAGGAGATGACTTCCCACGATCAA  
CTTAAAGGAATGTTTTTGAAGATCCATTATCCACCAACTGAGTCAAACATTGTCTATAGTTACA  
ATCAAATTGCTACTGAGTGA
